# Supplementary material
Source: Research Square preprint supplement (doi:10.21203/rs.3.rs-9876815/v1)
Supplement: Supplementary file 1 [file b39882b9c65833d242585249.pdf]

**The Spatial Determinants of Sustainable Dialysis**  
*Supplementary Information*

# S1. Baseline Scenario Extended Methods

## S1.1. System Boundaries

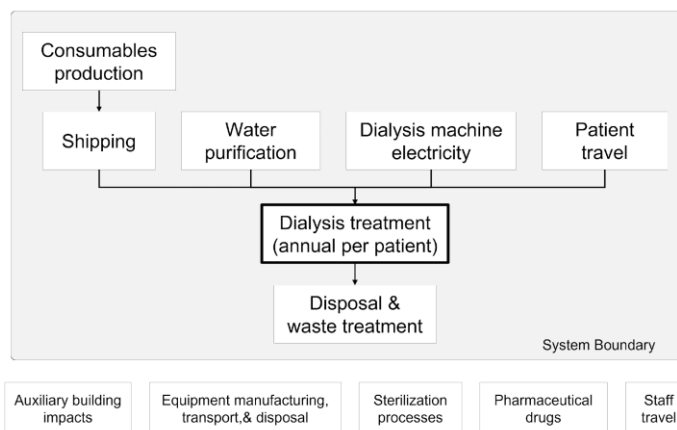

**Figure S1.** General system boundaries used for all scenarios (ICHD, home APD, and home CAPD) in baseline LCA.

The system boundary (Fig. S1), which was followed for all scenarios (ICHD, home APD, and home CAPD) in the baseline LCA and for all sensitivity analyses, included the production and shipping of consumables, water purification, dialysis machine electricity (ICHD, home APD), patient travel, and disposal and waste treatment processes. Figures S2-S4 show the detailed process trees used for the ICHD, home APD, and home CAPD assessments, and Figure S5 shows the detailed process tree used for the water purification sub-process. Reasoning for the processes excluded from the system boundaries were as follows:

- **Auxiliary building impacts:** To make results comparable to previously published dialysis LCAs (see Table 1), the majority of which exclude building energy use (e.g., lighting, HVAC) from their analysis, we excluded auxiliary building impacts.
- **Equipment manufacturing, transport, and disposal:** Based on the material composition of an HD machine from Bonnet et al.<sup>1</sup> and a conservative estimate of a 10-year lifespan and 4 patient capacity for an HD machine, we estimated that the HD machine contributes <1% of the annual per-patient ICHD CFP. APD machines and water purification systems were assumed to have similarly low contributions to the overall dialysis CFP. Therefore, equipment contributions were deemed negligible.
- **Sterilization processes for consumables:** Sterilization processes have been excluded from previously published LCAs. We also estimated that terminal steam sterilization of packaged PD fluid would contribute to <2% of the total home PD CFP, based on autoclave use data<sup>2</sup>, making sterilization contributions negligible. Because non-fluid consumables (dialyzer, tubing, cassette) have lower total masses than fluid and because these consumables are typically irradiation or electron-beam sterilized, which are more energy efficient than steam sterilization, we assumed that the CFP contributions from sterilization of these consumables would be lower than for fluid sterilization.
- **Pharmaceutical drugs:** The solutes and concentrates used to mix the standard HD and PD fluids were included in the analysis. Additional pharmaceutical drugs (e.g., anticoagulants, cardiovascular drugs, dietary supplements) dialysis patients may take

orally or intravenously were excluded from our analysis. Pharmaceuticals have generally been excluded from previous dialysis LCAs but are known to have significant environmental impacts. Lim et al.<sup>3</sup> found that pharmaceuticals contributed 36% of the total ICHD CFP. However, because of the complexity of drug supply chains and the significant patient-to-patient variation in prescriptions, pharmaceuticals were considered outside the scope of our analysis. While exact prescriptions are patient-specific, on average, HD patients are prescribed more pharmaceutical drugs than PD patients<sup>1</sup>, which would be expected to increase the environmental impacts of HD relative to PD.

- Staff travel: Previous dialysis LCAs have differed on whether staff travel is included in the analysis. For ICHD, Lim et al.<sup>3</sup> and Connor et al.<sup>4</sup> found that staff travel contributed 4.6% and 3%, respectively, of the total ICHD CFP. Connor et al.<sup>4</sup> also found that staff travel contributed <2.5% of the total home HD CFP, and home PD would be expected to require similar or less staff travel than home HD. Given the estimated <5% contribution to CFP, we excluded staff travel from the LCA boundary.

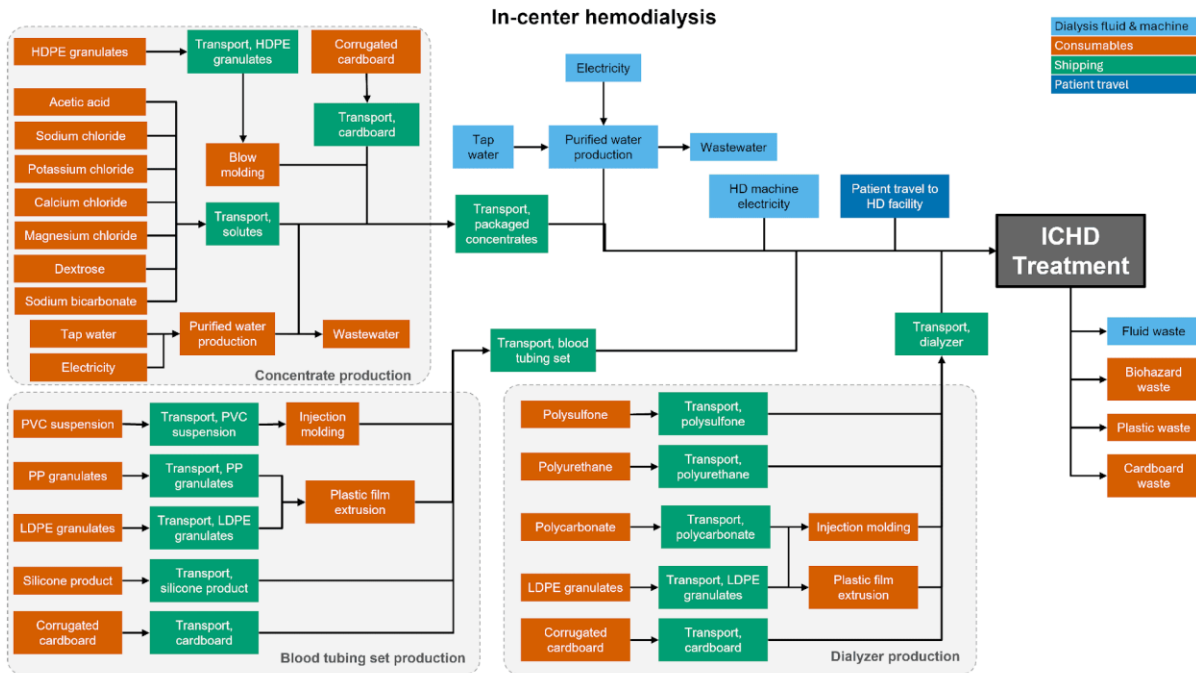

**Figure S2.** Process tree for in-center hemodialysis (ICHD) treatment. Concentrate, blood tubing set, and dialyzer production occur at their respective manufacturing facilities before shipping to the dialysis center. Water is purified on site to produce HD fluid. The HD machine uses electricity during treatment to control blood and fluid flow. The patient travels three times weekly to the dialysis center for treatment. Waste fluid, plastic (including biohazardous materials that have been in contact with patient blood), and cardboard are all disposed of following treatment.

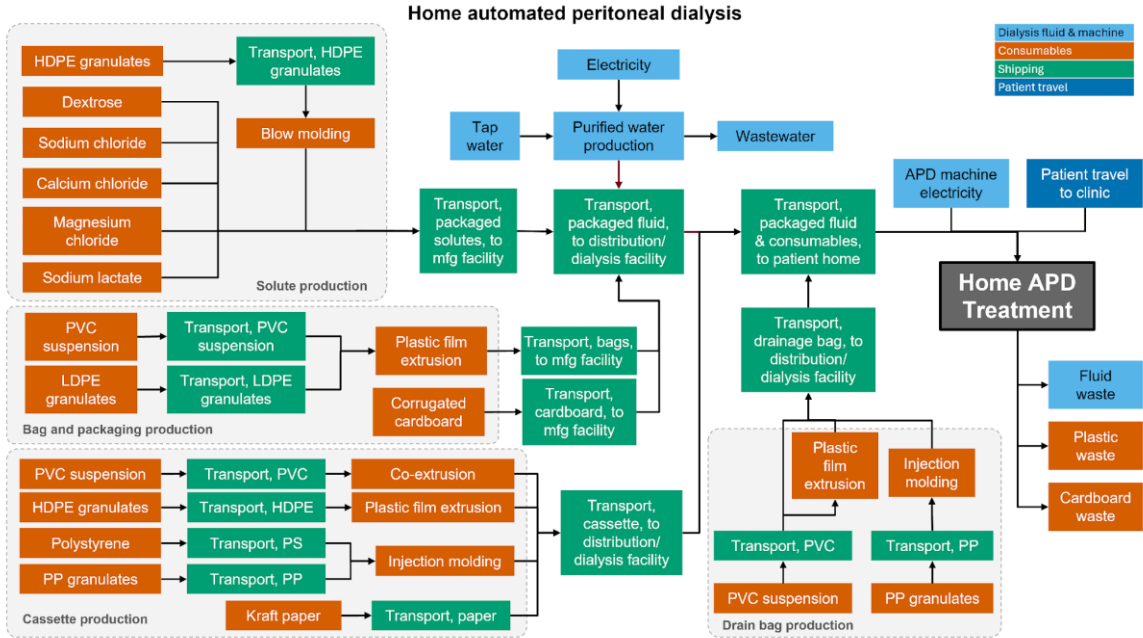

**Figure S3.** Process tree for home automated peritoneal dialysis (APD) treatment. Solute and bag production occur at their respective manufacturing facilities before shipping to the PD fluid manufacturing facility, where water purification, mixing, and packaging occur. The packaged fluid is then shipped to a distribution center or dialysis center. Cassette and drain bag production occur at their respective manufacturing facilities before shipping to a distribution center or dialysis center. Packaged fluid, cassettes, and drain bags are then transported to the patient's home. The APD machine uses electricity during treatment to control fluid inflow and outflow. The patient travels one time monthly to the dialysis center for clinical visits. Waste fluid, plastic, and cardboard are all disposed of following treatment.

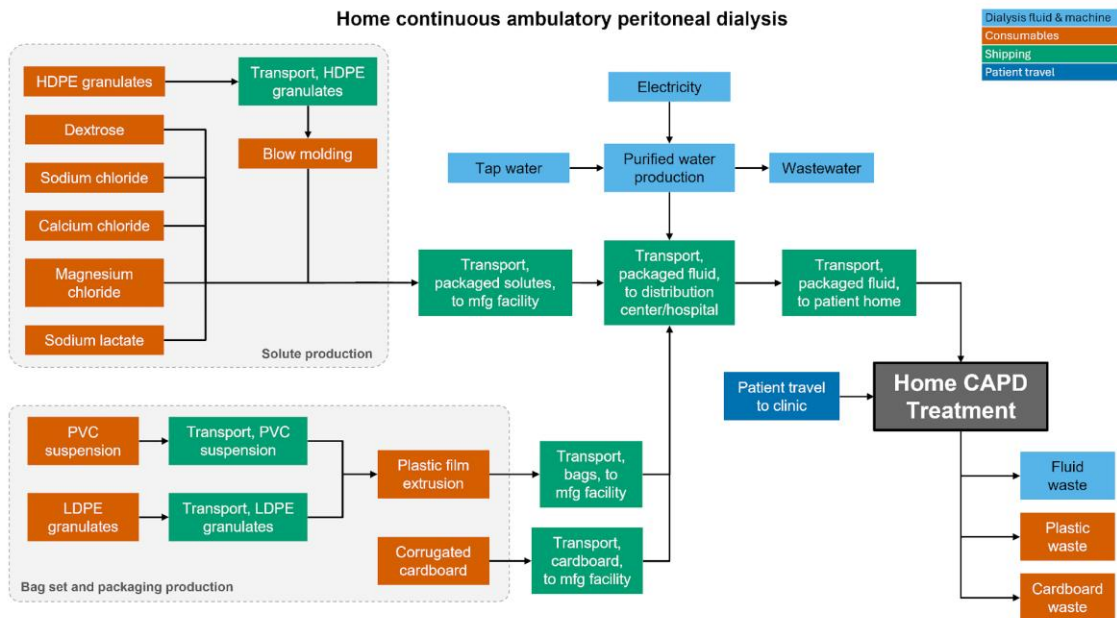

**Figure S4.** Process tree for home continuous ambulatory peritoneal dialysis (CAPD) treatment. Solute and bag set (including attached drain bag) production occur at their respective manufacturing facilities before shipping to the PD fluid manufacturing facility, where water purification, mixing, and packaging occur. The packaged fluid is then shipped to a distribution center or dialysis center, and then to the patient's home. The patient travels one time monthly to the dialysis center for clinical visits. Waste fluid, plastic, and cardboard are all disposed of following treatment.

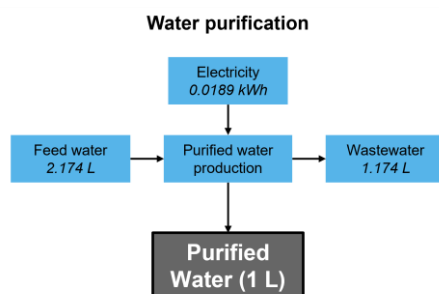

**Figure S5.** Process tree for water purification. This process is used for all water purification steps across all modeled scenarios (HD concentrate production, APD fluid manufacturing, CAPD fluid manufacturing, on-site HD fluid production). The electricity, feed water, and wastewater input process vary based on water purification location. Water and wastewater volumes and electricity consumption are based on the Essendon Fields reverse osmosis plant water and power consumption data from Barraclough et al.<sup>5</sup>

## S1.2. Material & Energy Inventories

**Table S1.** Baseline ICHD material and energy inventory.

| Item & Components                | Quantity per FU | ecoinvent process                                                                              | Quantity basis/reference                                                                   |
|----------------------------------|-----------------|------------------------------------------------------------------------------------------------|--------------------------------------------------------------------------------------------|
| Purified water (rinsing/priming) | 7020 L          | water purification   US-WECC*                                                                  | 45 L/session <sup>6</sup>                                                                  |
| Dialysate                        | 18,720 L        |                                                                                                | 500 mL/min, 4 hour sessions <sup>6</sup>                                                   |
| Purified water                   | 17,589 L        | water purification   US-WECC*                                                                  | 45X mix ratio <sup>7</sup>                                                                 |
| Acid concentrate                 | 416 L           |                                                                                                | Fresenius Naturalyte Liquid Acid, 45X mix ratio <sup>7</sup>                               |
| HDPE granulates                  | 9.27 kg         | polyethylene production, high density, granulate   polyethylene, high density, granulate   RoW |                                                                                            |
| Blow molding                     | 9.27 kg         | blow moulding   blow moulding   RER                                                            |                                                                                            |
| Acetic acid                      | 4.49 kg         | acetic acid production, from n-butane oxidation   acetic acid   RER                            |                                                                                            |
| Sodium chloride                  | 109.3 kg        | sodium chloride production, powder   sodium chloride, powder   RER                             |                                                                                            |
| Potassium chloride               | 2.79 kg         | potassium chloride production   potassium chloride   RER                                       |                                                                                            |
| Calcium chloride                 | 2.59 kg         | market for calcium chloride   calcium chloride   RER                                           |                                                                                            |
| Magnesium chloride               | 0.89 kg         | magnesium sulfate production   magnesium sulfate   RER                                         | MgSO <sub>4</sub> used as proxy for MgCl <sub>2</sub> following Sehgal et al. <sup>8</sup> |
| Dextrose                         | 18.7 kg         | glucose production   glucose   RER                                                             |                                                                                            |
| Purified water                   | 416 L           | water purification   DE*                                                                       |                                                                                            |
| Corrugated cardboard             | 15.3 kg         | corrugated board box production   corrugated board box   RER                                   |                                                                                            |
| Bicarb concentrate               | 715 L           |                                                                                                | Fresenius Liquid Sodium Bicarbonate Concentrate, 45X mix ratio <sup>9</sup>                |

|                                               |               |                                                                                                            |                                                                                               |
|-----------------------------------------------|---------------|------------------------------------------------------------------------------------------------------------|-----------------------------------------------------------------------------------------------|
| HDPE granulates                               | 14.5 kg       | polyethylene production, high density, granulate   polyethylene, high density, granulate   RoW             |                                                                                               |
| Blow molding                                  | 14.5 kg       | blow moulding   blow moulding   RER                                                                        |                                                                                               |
| Sodium bicarbonate                            | 58.1 kg       | market for sodium bicarbonate   sodium bicarbonate   RER                                                   |                                                                                               |
| Purified water                                | 715 L         | water purification   DE*                                                                                   |                                                                                               |
| Corrugated cardboard                          | 23.8 kg       | corrugated board box production   corrugated board box   RER                                               |                                                                                               |
| Blood tubing set                              | 156 sets      |                                                                                                            | Blood tubing set A from Sehgal et al. <sup>8</sup>                                            |
| Polyvinyl chloride                            | 35.8 kg       | polyvinyl chloride production, suspension polymerisation   polyvinyl chloride, suspension polymerised   CN |                                                                                               |
| Polypropylene                                 | 6.85 kg       | polypropylene production, granulate   polypropylene, granulate   CN                                        |                                                                                               |
| LDPE granulates                               | 0.91 kg       | polyethylene production, low density, granulate   polyethylene, low density, granulate   RoW               |                                                                                               |
| Silicone product                              | 1.79 kg       | silicone product production   silicone product   RER                                                       |                                                                                               |
| Injection molding                             | 35.8 kg       | injection moulding   injection moulding   RER                                                              |                                                                                               |
| Plastic film extrusion                        | 7.76 kg       | extrusion, plastic film   extrusion, plastic film   RER                                                    |                                                                                               |
| Corrugated cardboard                          | 1.42 kg       | corrugated board box production   corrugated board box   RER                                               |                                                                                               |
| Dialyzer                                      | 156 dialyzers |                                                                                                            | Dialyzer A from Sehgal et al. <sup>8</sup>                                                    |
| Polysulfone                                   | 3.22 kg       | polysulfone production, for membrane filtration production   polysulfone   GLO                             |                                                                                               |
| Polyurethane                                  | 0.73 kg       | polyurethane production, flexible foam, MDI-based   polyurethane, flexible foam   RoW                      |                                                                                               |
| Polycarbonate                                 | 26.4 kg       | polycarbonate production   polycarbonate   CN                                                              |                                                                                               |
| LDPE granulates                               | 2.89 kg       | polyethylene production, low density, granulate   polyethylene, low density, granulate   RoW               |                                                                                               |
| Injection molding                             | 22.5 kg       | injection moulding   injection moulding   RER                                                              |                                                                                               |
| Plastic film extrusion                        | 1.68 kg       | extrusion, plastic film   extrusion, plastic film   RER                                                    |                                                                                               |
| Corrugated cardboard                          | 1.85 kg       | corrugated board box production   corrugated board box   RER                                               |                                                                                               |
| HD machine electricity                        | 343 kWh       | market for electricity, low voltage   electricity, low voltage   US-WECC                                   | 2.2 kWh/session from Essendon Fields average session power in Barraclough et al. <sup>5</sup> |
| Dialysate and water waste                     | 25,740 L      | market for wastewater, average   wastewater, average   RoW                                                 |                                                                                               |
| Blood tubing set and dialyzer biohazard waste | 78.6 kg       | market for hazardous waste, for incineration   hazardous waste, for incineration   RoW                     |                                                                                               |
| Concentrate bottle plastic waste              | 23.8 kg       | market for waste plastic, mixture   waste plastic, mixture   RoW                                           |                                                                                               |
| Corrugated cardboard waste                    | 42.4 kg       | market for waste paperboard   waste paperboard   RoW                                                       |                                                                                               |

\*water purification process details in Table S4

Note: all ecoinvent processes are allocation at the point of substitution, system (APOS, S)

**Table S2.** Baseline home APD material and energy inventory.

| <b>Item &amp; Components</b> | <b>Quantity per FU</b> | <b>ecoinvent process</b>                                                                                   | <b>Quantity basis/reference</b>                                                                                 |
|------------------------------|------------------------|------------------------------------------------------------------------------------------------------------|-----------------------------------------------------------------------------------------------------------------|
| Packaged APD fluid           | 730 bags               |                                                                                                            | 2X-6L fluid bags daily, Baxter Dianeal PD-2 with 2.5% Dextrose <sup>10</sup>                                    |
| Purified water               | 4,380 L                | water purification   US-SERC*                                                                              |                                                                                                                 |
| Packaged solutes             | 171 kg                 |                                                                                                            |                                                                                                                 |
| HDPE granulates              | 4.22 kg                | polyethylene production, high density, granulate   polyethylene, high density, granulate   RoW             |                                                                                                                 |
| Blow molding                 | 4.22 kg                | blow moulding   blow moulding   RoW                                                                        |                                                                                                                 |
| Dextrose                     | 110 kg                 | glucose production   glucose   RoW                                                                         |                                                                                                                 |
| Sodium chloride              | 23.6 kg                | sodium chloride production, powder   sodium chloride, powder   RoW                                         |                                                                                                                 |
| Sodium lactate               | 32.7 kg                | lactic acid production   lactic acid   RoW                                                                 | Lactic acid used as proxy for sodium lactate following McAlister et al. and Barraclough et al. <sup>11,12</sup> |
| Calcium chloride             | 1.13 kg                | market for calcium chloride   calcium chloride   RoW                                                       |                                                                                                                 |
| Magnesium chloride           | 0.22 kg                | magnesium sulfate production   magnesium sulfate   RoW                                                     | MgSO <sub>4</sub> used as proxy for MgCl <sub>2</sub> following Sehgal et al. <sup>8</sup>                      |
| Empty fluid bags             | 730 bags               |                                                                                                            | measured                                                                                                        |
| Polyvinyl chloride           | 70.5 kg                | polyvinyl chloride production, suspension polymerisation   polyvinyl chloride, suspension polymerised   CN |                                                                                                                 |
| LDPE granulates              | 21.5 kg                | polyethylene production, low density, granulate   polyethylene, low density, granulate   RoW               |                                                                                                                 |
| Plastic film extrusion       | 92 kg                  | extrusion, plastic film   extrusion, plastic film   RoW                                                    |                                                                                                                 |
| Corrugated cardboard         | 230 kg                 | corrugated board box production   corrugated board box   US                                                |                                                                                                                 |
| 4-prong cassette             | 365 cassettes          |                                                                                                            | HomeChoice Automated PD set <sup>11</sup>                                                                       |
| Polyvinyl chloride           | 59.1 kg                | polyvinyl chloride production, suspension polymerisation   polyvinyl chloride, suspension polymerised   CN |                                                                                                                 |
| PP granulates                | 32.7 kg                | polypropylene production, granulate   polypropylene, granulate   CN                                        |                                                                                                                 |
| HDPE granulates              | 2.85 kg                | polyethylene production, high density, granulate   polyethylene, high density, granulate   RoW             |                                                                                                                 |
| Kraft paper                  | 2.41 kg                | kraft paper production   kraft paper   RoW                                                                 |                                                                                                                 |
| Polystyrene                  | 3.94 kg                | polystyrene production, general purpose   polystyrene, general purpose   RoW                               |                                                                                                                 |
| Plastic film extrusion       | 2.85 kg                | extrusion, plastic film   extrusion, plastic film   RoW                                                    |                                                                                                                 |
| Co-extrusion                 | 59.1 kg                | extrusion, co-extrusion of plastic sheets   extrusion, co-extrusion   RoW                                  |                                                                                                                 |
| Injection molding            | 36.6 kg                | injection moulding   injection moulding   RoW                                                              |                                                                                                                 |

|                            |          |                                                                                                            |                                                                                        |
|----------------------------|----------|------------------------------------------------------------------------------------------------------------|----------------------------------------------------------------------------------------|
| Cycler Drainage Bag        | 365 bags |                                                                                                            | C15L Cycler drainage bag <sup>11</sup>                                                 |
| Polyvinyl chloride         | 139.8 kg | polyvinyl chloride production, suspension polymerisation   polyvinyl chloride, suspension polymerised   CN |                                                                                        |
| PP granulates              | 8.76 kg  | polypropylene production, granulate   polypropylene, granulate   CN                                        |                                                                                        |
| Plastic film extrusion     | 74.1 kg  | extrusion, co-extrusion of plastic sheets   extrusion, co-extrusion   RoW                                  |                                                                                        |
| Injection molding          | 8.76 kg  | injection moulding   injection moulding   RoW                                                              |                                                                                        |
| APD machine electricity    | 329 kWh  | market for electricity, low voltage   electricity, low voltage   US-WECC                                   | HomeChoice APD system, 100W average power consumption, 9 hours per night <sup>13</sup> |
| Dialysis fluid waste       | 4,547 L  | market for wastewater, average   wastewater, average   RoW                                                 |                                                                                        |
| Plastic waste              | 343 kg   | market for waste plastic, mixture   waste plastic, mixture   RoW                                           |                                                                                        |
| Corrugated cardboard waste | 233 kg   | market for waste paperboard   waste paperboard   RoW                                                       |                                                                                        |

\*water purification process details in Table S4

Note: all ecoinvent processes are allocation at the point of substitution, system (APOS, S)

**Table S3.** Baseline home CAPD material and energy inventory.

| Item & Components                     | Quantity per FU | ecoinvent process                                                                              | Quantity basis/reference                                                                           |
|---------------------------------------|-----------------|------------------------------------------------------------------------------------------------|----------------------------------------------------------------------------------------------------|
| Packaged CAPD fluid                   | 1,460 bags      |                                                                                                | 4X-2L fluid bags daily, Baxter Dianeal PD-2 with 2.5% Dextrose <sup>10</sup>                       |
| Purified water                        | 2,920 L         | water purification   US-SERC*                                                                  |                                                                                                    |
| Packaged solutes                      | 114.2 kg        |                                                                                                |                                                                                                    |
| HDPE granulates                       | 2.8 kg          | polyethylene production, high density, granulate   polyethylene, high density, granulate   RoW |                                                                                                    |
| Blow molding                          | 2.8 kg          | blow moulding   blow moulding   RoW                                                            |                                                                                                    |
| Dextrose                              | 73 kg           | glucose production   glucose   RoW                                                             |                                                                                                    |
| Sodium chloride                       | 15.7 kg         | sodium chloride production, powder   sodium chloride, powder   RoW                             |                                                                                                    |
| Sodium lactate                        | 21.8 kg         | lactic acid production   lactic acid   RoW                                                     | Lactic acid used as proxy for sodium lactate following McAlister et al. and Barra <sup>11,12</sup> |
| Calcium chloride                      | 0.75 kg         | market for calcium chloride   calcium chloride   RoW                                           |                                                                                                    |
| Magnesium chloride                    | 0.15 kg         | magnesium sulfate production   magnesium sulfate   RoW                                         | MgSO <sub>4</sub> used as proxy for MgCl <sub>2</sub> following Sehgal et al. <sup>8</sup>         |
| Empty bag sets (including drain bags) | 1,460 bags      |                                                                                                | Measured                                                                                           |

|                            |          |                                                                                                            |
|----------------------------|----------|------------------------------------------------------------------------------------------------------------|
| Polyvinyl chloride         | 181.7 kg | polyvinyl chloride production, suspension polymerisation   polyvinyl chloride, suspension polymerised   CN |
| LDPE granulates            | 46.4 kg  | polyethylene production, low density, granulate   polyethylene, low density, granulate   RoW               |
| Plastic film extrusion     | 228 kg   | extrusion, plastic film   extrusion, plastic film   RoW                                                    |
| Corrugated cardboard       | 254 kg   | corrugated board box production   corrugated board box   US                                                |
| Dialysis fluid waste       | 3,031 L  | market for wastewater, average   wastewater, average   RoW                                                 |
| Plastic waste              | 231 kg   | market for waste plastic, mixture   waste plastic, mixture   RoW                                           |
| Corrugated cardboard waste | 253 kg   | market for waste paperboard   waste paperboard   RoW                                                       |

\*water purification process details in Table S4

Note: all ecoinvent processes are allocation at the point of substitution, system (APOS, S)

**Table S4.** Water purification sub-process material and energy inventories for baseline locations. Feed water and wastewater volumes and electricity consumption are based on the Essendon Fields reverse osmosis plant water and power consumption data from Barraclough et al.<sup>5</sup>

| Item & Components                   | Quantity per 1 L purified water | ecoinvent process                                                        |
|-------------------------------------|---------------------------------|--------------------------------------------------------------------------|
| <b>Water purification   US-WECC</b> |                                 |                                                                          |
| Feed water                          | 2.174 L                         | market for tap water   tap water   RoW                                   |
| Electricity                         | 0.0189 kWh                      | market for electricity, low voltage   electricity, low voltage   US-WECC |
| Wastewater                          | 1.174 L                         | market for wastewater, average   wastewater, average   RoW               |
| <b>Water purification   DE</b>      |                                 |                                                                          |
| Feed water                          | 2.174 L                         | market for tap water   tap water   RER without CH                        |
| Electricity                         | 0.0189 kWh                      | market for electricity, low voltage   electricity, low voltage   DE      |
| Wastewater                          | 1.174 L                         | market for wastewater, average   wastewater, average   RER without CH    |
| <b>Water purification   US-SERC</b> |                                 |                                                                          |
| Feed water                          | 2.174 L                         | market for tap water   tap water   RoW                                   |
| Electricity                         | 0.0189 kWh                      | market for electricity, low voltage   electricity, low voltage   US-SERC |
| Wastewater                          | 1.174 L                         | market for wastewater, average   wastewater, average   RoW               |

Note: all ecoinvent processes are allocation at the point of substitution, system (APOS, S)

### S1.3. Location & Transportation Data

Figure S6 shows the location assumptions for all the material sourcing, manufacturing, and treatment process for the baseline assessment. The transportation distances and ecoinvent transport processes used for each transportation step are included in Tables S5 (ICHHD) and S6 (home APD and CAPD). In general, land shipping was assumed to use a 16-32 metric ton truck at all stages, except for the final transportation of PD consumables from the distribution center to the patient home, which was assumed to use a 3.5-7.5 metric ton truck. All ocean shipping used container ship transport. Where data was available, geography-specific vehicles were used (e.g., Europe [RER]). In all other cases, rest-of-world (RoW) or global (GLO) values were used. All road transport distances were obtained from Google Maps, and all ocean transport distances were obtained from sea-distances.org.

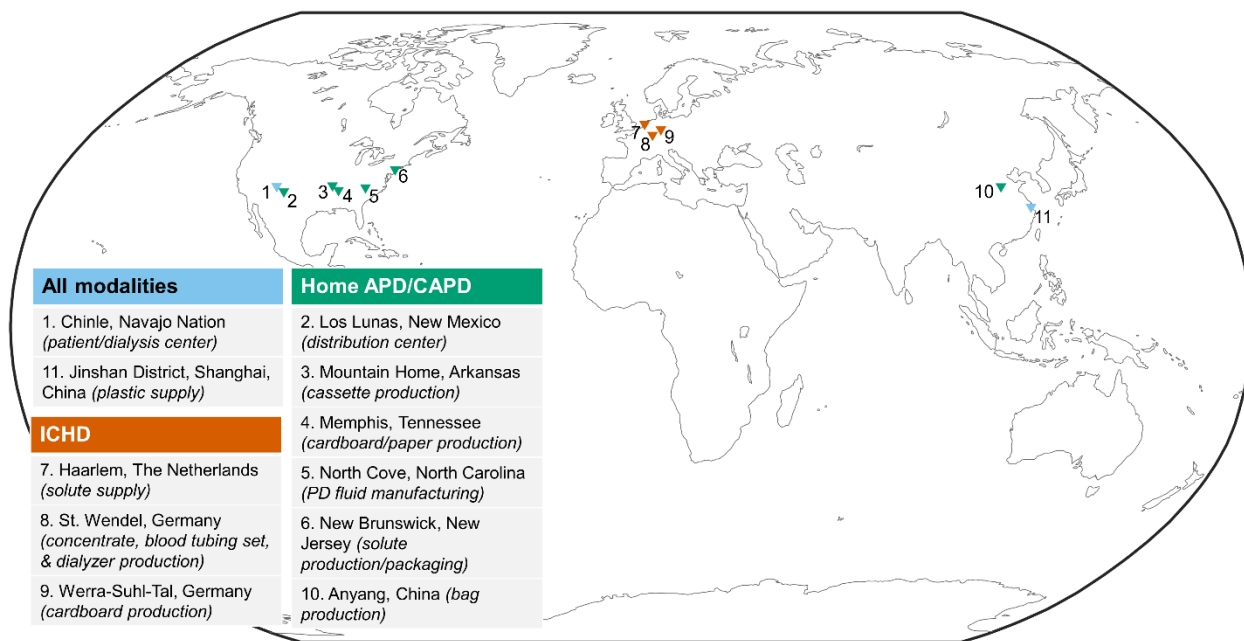

**Figure S6.** Map showing the location assumptions for all process steps in the baseline LCA for ICHD, home APD, and home CAPD.

**Table S5.** ICHD transportation details

| Transport process                                                     | Starting location                 | Ending location       | Distance (km) | ecoinvent process                                                                                                               |
|-----------------------------------------------------------------------|-----------------------------------|-----------------------|---------------|---------------------------------------------------------------------------------------------------------------------------------|
| Plastic to concentrate/ blood tubing set/dialyzer production          | Jinshan District, Shanghai, China | St. Wendel, Germany   | 125           | transport, freight, lorry, 16-32 metric ton, diesel, EURO 6   transport, freight, lorry, 16-32 metric ton, diesel, EURO 6   RoW |
|                                                                       |                                   |                       | 19,872        | transport, freight, sea, container ship, heavy fuel oil   transport, freight, sea, container ship, heavy fuel oil   GLO         |
|                                                                       |                                   |                       | 620           | transport, freight, lorry, 16-32 metric ton, diesel, EURO 6   transport, freight, lorry, 16-32 metric ton, diesel, EURO 6   RER |
| Solutes to concentrate production                                     | Haarlem, The Netherlands          | St. Wendel, Germany   | 465           | transport, freight, lorry, 16-32 metric ton, diesel, EURO 6   transport, freight, lorry, 16-32 metric ton, diesel, EURO 6   RER |
| Cardboard to concentrate/ blood tubing set/dialyzer production        | Werra-Suhl-Tal, Germany           | St. Wendel, Germany   | 350           | transport, freight, lorry, 16-32 metric ton, diesel, EURO 6   transport, freight, lorry, 16-32 metric ton, diesel, EURO 6   RER |
| Packaged concentrates/ blood tubing sets/dialyzers to dialysis center | St. Wendel, Germany               | Chinle, Navajo Nation | 620           | transport, freight, lorry, 16-32 metric ton, diesel, EURO 6   transport, freight, lorry, 16-32 metric ton, diesel, EURO 6   RER |
|                                                                       |                                   |                       | 7,434         | transport, freight, sea, container ship, heavy fuel oil   transport, freight, sea, container ship, heavy fuel oil   GLO         |
|                                                                       |                                   |                       | 3,095         | transport, freight, lorry, 16-32 metric ton, diesel, EURO 6   transport, freight, lorry, 16-32 metric ton, diesel, EURO 6   RoW |
| Patient home to dialysis center                                       | near Chinle, Navajo Nation        | Chinle, Navajo Nation | 10            | transport, passenger, car, petrol, medium size, EURO 5   transport, passenger, car, petrol, medium size, EURO 5   RoW           |

Note: all ecoinvent processes are allocation at the point of substitution, system (APOS, S)

**Table S6.** Home APD and CAPD transportation details

| <b>Transport process</b>            | <b>Starting location</b>          | <b>Ending location</b> | <b>Distance (km)</b> | <b>ecoinvent process</b>                                                                                                                                                                                                                                   |
|-------------------------------------|-----------------------------------|------------------------|----------------------|------------------------------------------------------------------------------------------------------------------------------------------------------------------------------------------------------------------------------------------------------------|
| Plastic to bag production           | Jinshan District, Shanghai, China | Anyang, China          | 1,091                | transport, freight, lorry, 16-32 metric ton, diesel, EURO 6   transport, freight, lorry, 16-32 metric ton, diesel, EURO 6   RoW                                                                                                                            |
| Bags to fluid manufacturing         | Anyang, China                     | North Cove, NC         | 4,443<br>10,568      | transport, freight, lorry, 16-32 metric ton, diesel, EURO 6   transport, freight, lorry, 16-32 metric ton, diesel, EURO 6   RoW<br>transport, freight, sea, container ship, heavy fuel oil   transport, freight, sea, container ship, heavy fuel oil   GLO |
| HDPE to solute production           | Jinshan District, Shanghai, China | New Brunswick, NJ      | 175<br>19,598        | transport, freight, lorry, 16-32 metric ton, diesel, EURO 6   transport, freight, lorry, 16-32 metric ton, diesel, EURO 6   RoW<br>transport, freight, sea, container ship, heavy fuel oil   transport, freight, sea, container ship, heavy fuel oil   GLO |
| Solutes to fluid manufacturing      | New Brunswick, NJ                 | North Cove, NC         | 1,065                | transport, freight, lorry, 16-32 metric ton, diesel, EURO 6   transport, freight, lorry, 16-32 metric ton, diesel, EURO 6   RoW                                                                                                                            |
| Cardboard to fluid manufacturing    | Memphis, TN                       | North Cove, NC         | 882                  | transport, freight, lorry, 16-32 metric ton, diesel, EURO 6   transport, freight, lorry, 16-32 metric ton, diesel, EURO 6   RoW                                                                                                                            |
| Fluid to distribution center        | North Cove, NC                    | Los Lunas, NM          | 2,539                | transport, freight, lorry, 16-32 metric ton, diesel, EURO 6   transport, freight, lorry, 16-32 metric ton, diesel, EURO 6   RoW                                                                                                                            |
| Plastic to cassette production*     | Jinshan District, Shanghai, China | Mountain Home, AR      | 2,822<br>10,571      | transport, freight, lorry, 16-32 metric ton, diesel, EURO 6   transport, freight, lorry, 16-32 metric ton, diesel, EURO 6   RoW<br>transport, freight, sea, container ship, heavy fuel oil   transport, freight, sea, container ship, heavy fuel oil   GLO |
| Paper to cassette production*       | Memphis, TN                       | Mountain Home, AR      | 314                  | transport, freight, lorry, 16-32 metric ton, diesel, EURO 6   transport, freight, lorry, 16-32 metric ton, diesel, EURO 6   RoW                                                                                                                            |
| Cassettes to distribution center*   | Mountain Home, AR                 | Los Lunas, NM          | 1,443                | transport, freight, lorry, 16-32 metric ton, diesel, EURO 6   transport, freight, lorry, 16-32 metric ton, diesel, EURO 6   RoW                                                                                                                            |
| Drain bags to distribution center*  | Anyang, China                     | Los Lunas, NM          | 1,946<br>10,568      | transport, freight, lorry, 16-32 metric ton, diesel, EURO 6   transport, freight, lorry, 16-32 metric ton, diesel, EURO 6   RoW<br>transport, freight, sea, container ship, heavy fuel oil   transport, freight, sea, container ship, heavy fuel oil   GLO |
| Distribution center to patient home | Los Lunas, NM                     | Chinle, Navajo Nation  | 372                  | transport, freight, lorry, 3.5-7.5 metric ton, diesel, EURO 6   transport, freight, lorry, 3.5-7.5 metric ton, diesel, EURO 6   RoW                                                                                                                        |
| Patient home to dialysis center     | near Chinle, Navajo Nation        | Chinle, Navajo Nation  | 10                   | transport, passenger, car, petrol, medium size, EURO 5   transport, passenger, car, petrol, medium size, EURO 5   RoW                                                                                                                                      |

\*Home APD only

Note: all ecoinvent processes are allocation at the point of substitution, system (APOS, S)

## S2. End-of-Life Sensitivity Analysis

### S2.1. End-of-Life Sensitivity Analysis Methods

For all end-of-life processes (wastewater, hazardous waste incineration, waste plastic, waste paperboard) in the baseline analysis, we used RoW geography market processes. Because the environmental impacts of different waste treatment processes can vary, we conducted a sensitivity analysis. The baseline LCAs for all three dialysis modalities were modified to vary the market geographies for waste plastic and waste paperboard. The five geographies (South Africa, India, Germany, United Kingdom, Greece) we selected represent the full range of emissions factors from the available data. These market processes use an average mix of waste treatment processes (e.g., incineration, landfill, open burning). Details about the ecoinvent processes used for the sensitivity analysis are included in Table S7.

**Table S7.** End of life sensitivity process details

| Item                                          | Quantity per FU | ecoinvent process                                                                                                                                                                                                                                                                                                                                                                                                                                                                                    |
|-----------------------------------------------|-----------------|------------------------------------------------------------------------------------------------------------------------------------------------------------------------------------------------------------------------------------------------------------------------------------------------------------------------------------------------------------------------------------------------------------------------------------------------------------------------------------------------------|
| <b>ICHD</b>                                   |                 |                                                                                                                                                                                                                                                                                                                                                                                                                                                                                                      |
| Dialysate and water waste                     | 25,740 L        | market for wastewater, average   wastewater, average   RoW (Rest-of-World, baseline)                                                                                                                                                                                                                                                                                                                                                                                                                 |
| Blood tubing set and dialyzer biohazard waste | 78.6 kg         | market for hazardous waste, for incineration   hazardous waste, for incineration   RoW (Rest-of-World, baseline)                                                                                                                                                                                                                                                                                                                                                                                     |
| Concentrate bottle plastic waste              | 23.8 kg         | market for waste plastic, mixture   waste plastic, mixture   RoW (Rest-of-World, baseline)<br>market for waste plastic, mixture   waste plastic, mixture   ZA (South Africa)<br>market for waste plastic, mixture   waste plastic, mixture   IN (India)<br>market for waste plastic, mixture   waste plastic, mixture   DE (Germany)<br>market for waste plastic, mixture   waste plastic, mixture   GB (United Kingdom)<br>market for waste plastic, mixture   waste plastic, mixture   GR (Greece) |
| Corrugated cardboard waste                    | 42.4 kg         | market for waste paperboard   waste paperboard   RoW (Rest-of-World, baseline)<br>market for waste paperboard   waste paperboard   ZA (South Africa)<br>market for waste paperboard   waste paperboard   IN (India)<br>market for waste paperboard   waste paperboard   DE (Germany)<br>market for waste paperboard   waste paperboard   GB (United Kingdom)<br>market for waste paperboard   waste paperboard   GR (Greece)                                                                         |
| <b>Home APD</b>                               |                 |                                                                                                                                                                                                                                                                                                                                                                                                                                                                                                      |
| Dialysis fluid waste                          | 4,547 L         | market for wastewater, average   wastewater, average   RoW (Rest-of-World, baseline)                                                                                                                                                                                                                                                                                                                                                                                                                 |
| Plastic waste                                 | 343 kg          | market for waste plastic, mixture   waste plastic, mixture   RoW (Rest-of-World, baseline)<br>market for waste plastic, mixture   waste plastic, mixture   ZA (South Africa)<br>market for waste plastic, mixture   waste plastic, mixture   IN (India)<br>market for waste plastic, mixture   waste plastic, mixture   DE (Germany)<br>market for waste plastic, mixture   waste plastic, mixture   GB (United Kingdom)<br>market for waste plastic, mixture   waste plastic, mixture   GR (Greece) |

|                            |         |                                                                                                                                                                                                                                                                                                                                                                                                                                                                                                      |
|----------------------------|---------|------------------------------------------------------------------------------------------------------------------------------------------------------------------------------------------------------------------------------------------------------------------------------------------------------------------------------------------------------------------------------------------------------------------------------------------------------------------------------------------------------|
| Corrugated cardboard waste | 233 kg  | market for waste paperboard   waste paperboard   RoW (Rest-of-World, baseline)<br>market for waste paperboard   waste paperboard   ZA (South Africa)<br>market for waste paperboard   waste paperboard   IN (India)<br>market for waste paperboard   waste paperboard   DE (Germany)<br>market for waste paperboard   waste paperboard   GB (United Kingdom)<br>market for waste paperboard   waste paperboard   GR (Greece)                                                                         |
| <b>Home CAPD</b>           |         |                                                                                                                                                                                                                                                                                                                                                                                                                                                                                                      |
| Dialysis fluid waste       | 4,547 L | market for wastewater, average   wastewater, average   RoW (Rest-of-World, baseline)                                                                                                                                                                                                                                                                                                                                                                                                                 |
| Plastic waste              | 343 kg  | market for waste plastic, mixture   waste plastic, mixture   RoW (Rest-of-World, baseline)<br>market for waste plastic, mixture   waste plastic, mixture   ZA (South Africa)<br>market for waste plastic, mixture   waste plastic, mixture   IN (India)<br>market for waste plastic, mixture   waste plastic, mixture   DE (Germany)<br>market for waste plastic, mixture   waste plastic, mixture   GB (United Kingdom)<br>market for waste plastic, mixture   waste plastic, mixture   GR (Greece) |
| Corrugated cardboard waste | 233 kg  | market for waste paperboard   waste paperboard   RoW (Rest-of-World, baseline)<br>market for waste paperboard   waste paperboard   ZA (South Africa)<br>market for waste paperboard   waste paperboard   IN (India)<br>market for waste paperboard   waste paperboard   DE (Germany)<br>market for waste paperboard   waste paperboard   GB (United Kingdom)<br>market for waste paperboard   waste paperboard   GR (Greece)                                                                         |

Note: all ecoinvent processes are allocation at the point of substitution, system (APOS, S)

## S2.1. End-of-Life Sensitivity Analysis Results

Figures S7 and S8 show the water demand and CFP results for the end-of-life sensitivity analysis. End-of-life processes contributed to <2% of the overall water demand for all modalities and all scenarios (Fig. S7). The total ICHD CFP only varied 3% (Fig. S8a). This was because biohazardous waste (which did not vary in this sensitivity because additional geography data was not available for hazardous waste) dominated the end-of-life CFP of HD. Home APD and home CAPD showed more variation in end-of-life CFP (Figs. S8b-c), but impact on the overall treatment CFP was still minor (<15%). Consumables manufacturing and shipping remained the dominant contributors to PD CFP. For the remaining sensitivity analyses, the baseline RoW end-of-life processes were used.

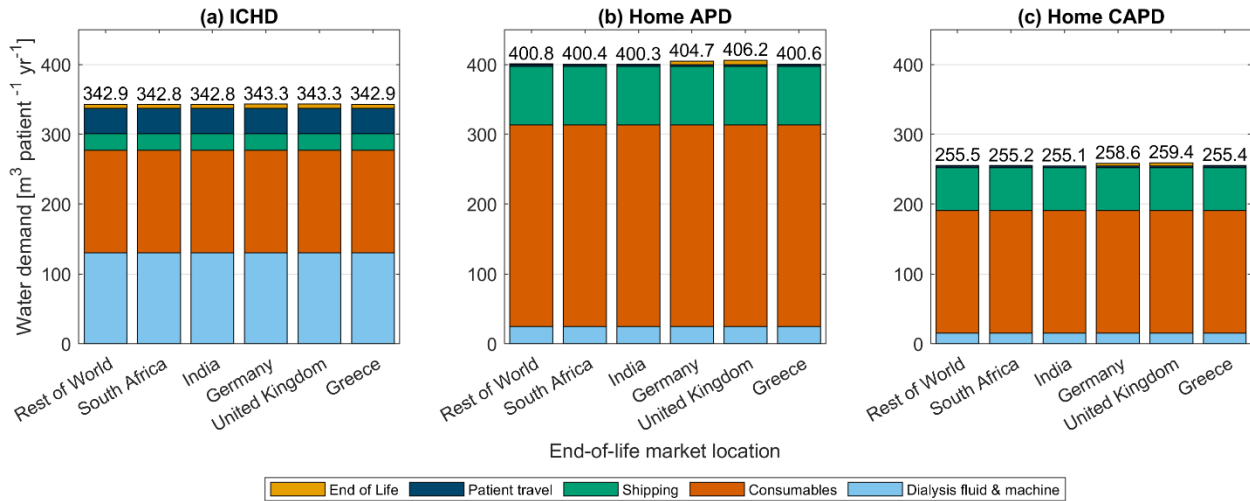

**Figure S7.** Annual per-patient water demand of (a) ICHD, (b) home APD, and (c) home CAPD, using different end-of-life market processes for plastic and paper waste. Stacked bars show contributions from dialysis fluid and machine operation, consumables, shipping, patient travel, and all end-of-life processes. Home CAPD has the lowest water demand, and APD has the highest water demand regardless of end-of-life process. End-of-life processes contribute to <2% of overall water demand in all scenarios.

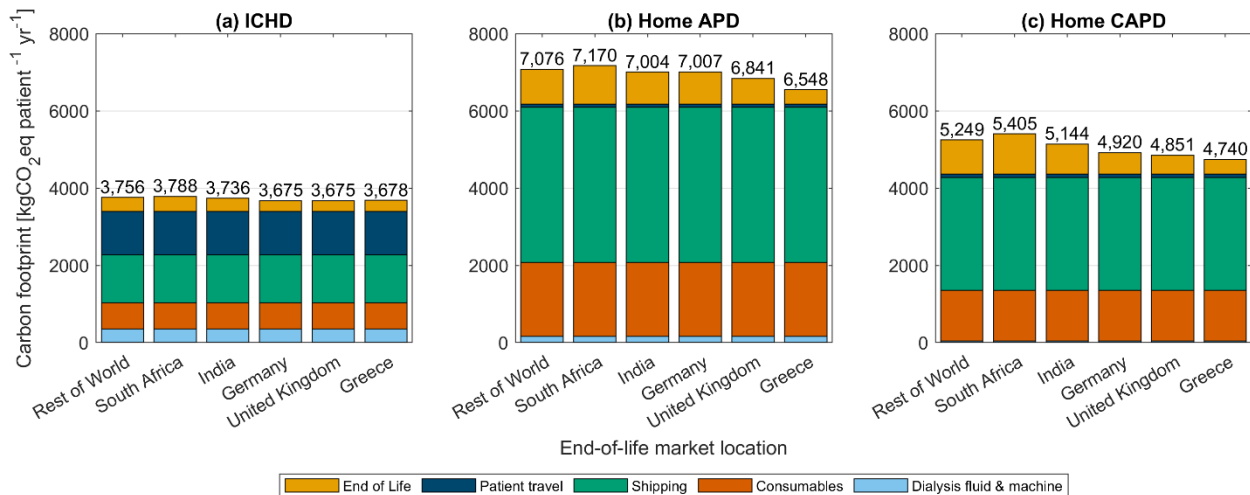

**Figure S8.** Annual per-patient CFP of (a) ICHD, (b) home APD, and (c) home CAPD, using different end-of-life market processes for plastic and paper waste. Stacked bars show contributions from dialysis fluid and machine operation, consumables, shipping, patient travel, and all end-of-life processes. ICHD has the lowest CFP, and APD has the highest CFP regardless of end-of-life process. ICHD shows the least variation, as biohazardous waste dominates end-of-life CFP (and does not vary in this LCA setup), and contributes to only 3% variation in overall ICHD CFP. Home APD and home CAPD show more variation in end-of-life CFP, but impact on the overall treatment CFP is still minor (<15%).

## S3. Patient Location and Travel Sensitivity Analysis

### S3.1. Navajo Nation Patient Travel Water Demand Results

Figure S9 shows the water demand results of the patient travel sensitivity for ICHD and home CAPD for the Navajo Nation patient scenario. Much like the CFP (see Figures 3a-b), the water demand of ICHD increased significantly with increasing patient distance due to the embodied water demand of passenger cars and frequency of travel for ICHD. However, the relative contribution of patient travel to water demand was slightly lower than the contribution to CFP (70% and 90%, respectively, for a patient living 200 km from the dialysis center). The water demand of home CAPD increased only moderately (21%) for a very rural patient compared to an urban patient.

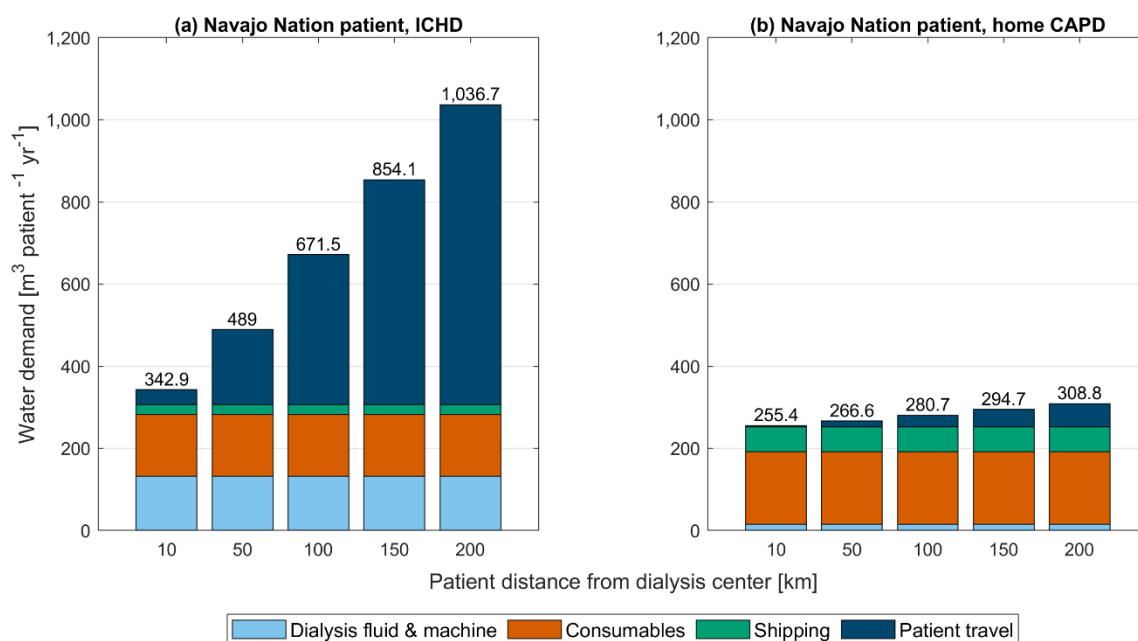

**Figure S9.** Annual per-patient water demand of (a) ICHD and (b) home CAPD for a patient living between 10 and 200 km from a dialysis center in Chinle, Navajo Nation. Stacked bars show contributions from dialysis fluid and machine operation, consumables, shipping, and patient travel. ICHD has higher water demand than home CAPD in all cases, and ICHD water demand increases drastically with increasing patient distance from the dialysis center due to the embodied water use of passenger car travel.

### S3.2. Patient Geography Sensitivity Analysis Methods

To explore patient geography sensitivity, the initial baseline LCAs for ICHD and home CAPD were modified for eight additional patient locations in the U.S. and sub-Saharan Africa (Fig. S10). These locations were selected to represent a broad geographic range across these two regions and to include examples of places where home dialysis both is and is not currently available.

For ICHD, water is purified on-site in the dialysis center, and electricity is used for HD machine operation. The water purification sub-processes and HD machine electricity processes

used for the different patient locations analyzed are detailed in Tables S8 and S9. All other material and energy processes were identical to the baseline LCA (Tables S1-S3).

The transportation distances and ecoinvent transport processes used for each transportation step in the patient geography sensitivity analysis are included in Tables S10 (ICHHD) and S11 (home CAPD). For the U.S. patient scenarios, we assumed that PD fluid was shipped from the manufacturer to a regional distribution center before delivery to the patient. For the sub-Saharan Africa patient scenarios, we assumed that PD fluid was shipped from the manufacturer to the local dialysis center before final delivery to the patient. Like the baseline LCA, land shipping was assumed to use a 16-32 metric ton truck at all stages, except for the final transportation of PD consumables from the distribution center or dialysis center to the patient home, which was assumed to use a 3.5-7.5 metric ton truck. All ocean shipping used container ship transport. Europe (RER) geography processes were used for all transport in Europe, and South Africa (ZA) geography processes were used for all transport in sub-Saharan Africa. In cases where geography-specific data was unavailable, RoW or GLO values were used. Like the Navajo Nation patient travel sensitivity, the distance between the patient and the dialysis center was varied from 10 km to 200 km for all eight patient location scenarios. For the four sub-Saharan Africa patient scenarios, the ICHHD analysis was also conducted for motor scooter and minibus travel in addition to passenger car travel due to the high use of these transit options across sub-Saharan Africa<sup>14</sup>.

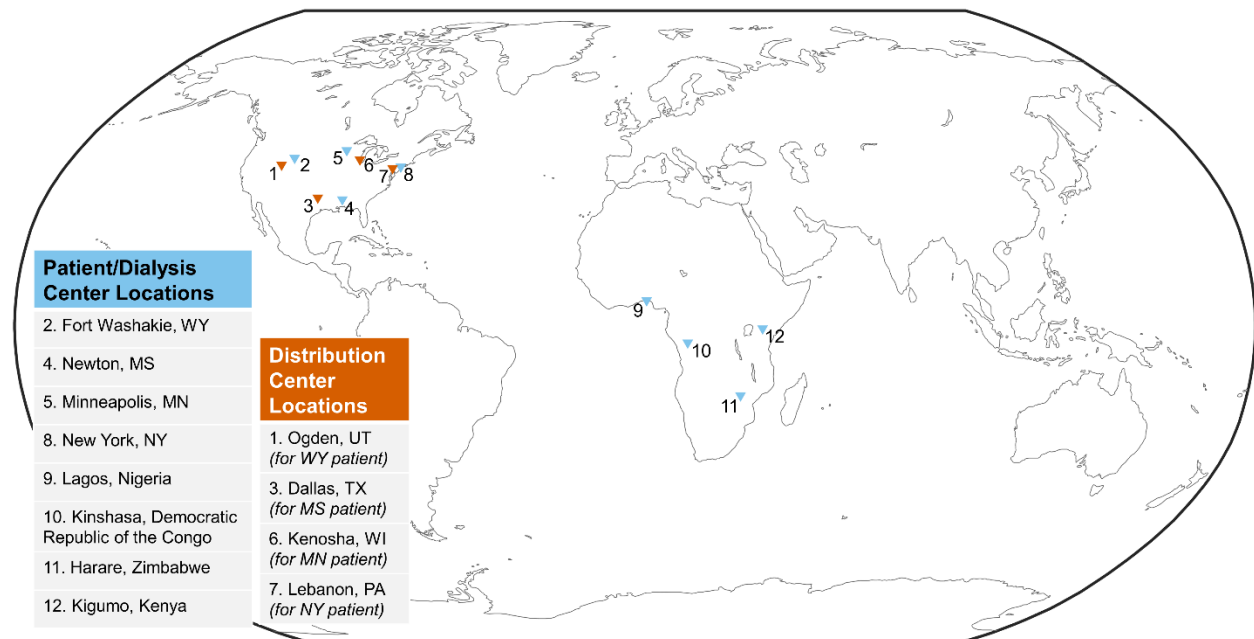

**Figure S10.** Map showing the patient/dialysis center and distribution center locations for the patient location and travel sensitivity analysis for ICHHD and home CAPD. Distribution center locations are based on Fresenius/TruBlue Logistics distribution locations<sup>15</sup>.

**Table S8.** Water purification sub-process material and energy inventories for ICHD for various patient/dialysis center location scenarios. Feed water and wastewater volumes and electricity consumption data from Barraclough et al.<sup>5</sup>

| <b>Item &amp; Components</b>                            | <b>Quantity per 1 L purified water</b> | <b>ecoinvent process</b>                                                 |
|---------------------------------------------------------|----------------------------------------|--------------------------------------------------------------------------|
| <b>Water purification   US-WECC (Fort Washakie, WY)</b> |                                        |                                                                          |
| Feed water                                              | 2.174 L                                | market for tap water   tap water   RoW                                   |
| Electricity                                             | 0.0189 kWh                             | market for electricity, low voltage   electricity, low voltage   US-WECC |
| Wastewater                                              | 1.174 L                                | market for wastewater, average   wastewater, average   RoW               |
| <b>Water purification   US-SERC (Newton, MS)</b>        |                                        |                                                                          |
| Feed water                                              | 2.174 L                                | market for tap water   tap water   RoW                                   |
| Electricity                                             | 0.0189 kWh                             | market for electricity, low voltage   electricity, low voltage   US-SERC |
| Wastewater                                              | 1.174 L                                | market for wastewater, average   wastewater, average   RoW               |
| <b>Water purification   US-MRO (Minneapolis, MN)</b>    |                                        |                                                                          |
| Feed water                                              | 2.174 L                                | market for tap water   tap water   RoW                                   |
| Electricity                                             | 0.0189 kWh                             | market for electricity, low voltage   electricity, low voltage   US-MRO  |
| Wastewater                                              | 1.174 L                                | market for wastewater, average   wastewater, average   RoW               |
| <b>Water purification   US-NPCC (New York, NY)</b>      |                                        |                                                                          |
| Feed water                                              | 2.174 L                                | market for tap water   tap water   RoW                                   |
| Electricity                                             | 0.0189 kWh                             | market for electricity, low voltage   electricity, low voltage   US-NPCC |
| Wastewater                                              | 1.174 L                                | market for wastewater, average   wastewater, average   RoW               |
| <b>Water purification   NG (Lagos, Nigeria)</b>         |                                        |                                                                          |
| Feed water                                              | 2.174 L                                | market for tap water   tap water   ZA                                    |
| Electricity                                             | 0.0189 kWh                             | market for electricity, low voltage   electricity, low voltage   NG      |
| Wastewater                                              | 1.174 L                                | market for wastewater, average   wastewater, average   RoW               |
| <b>Water purification   CD (Kinshasa, DRC)</b>          |                                        |                                                                          |
| Feed water                                              | 2.174 L                                | market for tap water   tap water   ZA                                    |
| Electricity                                             | 0.0189 kWh                             | market for electricity, low voltage   electricity, low voltage   CD      |
| Wastewater                                              | 1.174 L                                | market for wastewater, average   wastewater, average   RoW               |
| <b>Water purification   ZW (Harare, Zimbabwe)</b>       |                                        |                                                                          |
| Feed water                                              | 2.174 L                                | market for tap water   tap water   ZA                                    |
| Electricity                                             | 0.0189 kWh                             | market for electricity, low voltage   electricity, low voltage   ZW      |
| Wastewater                                              | 1.174 L                                | market for wastewater, average   wastewater, average   RoW               |
| <b>Water purification   KE (Kigumo, Kenya)</b>          |                                        |                                                                          |
| Feed water                                              | 2.174 L                                | market for tap water   tap water   ZA                                    |
| Electricity                                             | 0.0189 kWh                             | market for electricity, low voltage   electricity, low voltage   KE      |
| Wastewater                                              | 1.174 L                                | market for wastewater, average   wastewater, average   RoW               |

Note: all ecoinvent processes are allocation at the point of substitution, system (APOS, S)

**Table S9.** HD machine electricity inventory for ICHD for various patient/dialysis center location scenarios.

| <b>Patient/dialysis center location</b> | <b>ecoinvent process for HD machine electricity</b>                      |
|-----------------------------------------|--------------------------------------------------------------------------|
| Fort Washakie, WY                       | market for electricity, low voltage   electricity, low voltage   US-WECC |
| Newton, MS                              | market for electricity, low voltage   electricity, low voltage   US-SERC |
| Minneapolis, MN                         | market for electricity, low voltage   electricity, low voltage   US-MRO  |
| New York, NY                            | market for electricity, low voltage   electricity, low voltage   US-NPCC |
| Lagos, Nigeria                          | market for electricity, low voltage   electricity, low voltage   NG      |
| Kinshasa, DRC                           | market for electricity, low voltage   electricity, low voltage   CD      |
| Harare, Zimbabwe                        | market for electricity, low voltage   electricity, low voltage   ZW      |
| Kigumo, Kenya                           | market for electricity, low voltage   electricity, low voltage   KE      |

Note: all ecoinvent processes are allocation at the point of substitution, system (APOS, S)

**Table S10.** ICHD transportation details for various patient/dialysis center location scenarios. All other transportation processes not listed here are identical to the baseline ICHD scenario (Table S5).

| <b>Transport process</b>                                                                       | <b>Starting location</b>                                                                                     | <b>Ending location</b> | <b>Distance (km)</b> | <b>ecoinvent process</b>                                                                                                                 |                                                                                                                                          |
|------------------------------------------------------------------------------------------------|--------------------------------------------------------------------------------------------------------------|------------------------|----------------------|------------------------------------------------------------------------------------------------------------------------------------------|------------------------------------------------------------------------------------------------------------------------------------------|
| Packaged concentrates/ blood tubing sets/dialyzers to dialysis center (U.S. patient scenarios) | St. Wendel, Germany                                                                                          | Fort Washakie, WY      | 620                  | transport, freight, lorry, 16-32 metric ton, diesel, EURO 6   transport, freight, lorry, 16-32 metric ton, diesel, EURO 6   RER          |                                                                                                                                          |
|                                                                                                |                                                                                                              |                        | 6,636                | transport, freight, sea, container ship, heavy fuel oil   transport, freight, sea, container ship, heavy fuel oil   GLO                  |                                                                                                                                          |
|                                                                                                |                                                                                                              |                        | 3,251                | transport, freight, lorry, 16-32 metric ton, diesel, EURO 6   transport, freight, lorry, 16-32 metric ton, diesel, EURO 6   RoW          |                                                                                                                                          |
|                                                                                                | St. Wendel, Germany                                                                                          | Newton, MS             | 620                  | transport, freight, lorry, 16-32 metric ton, diesel, EURO 6   transport, freight, lorry, 16-32 metric ton, diesel, EURO 6   RER          |                                                                                                                                          |
|                                                                                                |                                                                                                              |                        | 7,434                | transport, freight, sea, container ship, heavy fuel oil   transport, freight, sea, container ship, heavy fuel oil   GLO                  |                                                                                                                                          |
|                                                                                                |                                                                                                              |                        | 993                  | transport, freight, lorry, 16-32 metric ton, diesel, EURO 6   transport, freight, lorry, 16-32 metric ton, diesel, EURO 6   RoW          |                                                                                                                                          |
|                                                                                                | St. Wendel, Germany                                                                                          | Minneapolis, MN        | 620                  | transport, freight, lorry, 16-32 metric ton, diesel, EURO 6   transport, freight, lorry, 16-32 metric ton, diesel, EURO 6   RER          |                                                                                                                                          |
|                                                                                                |                                                                                                              |                        | 6,636                | transport, freight, sea, container ship, heavy fuel oil   transport, freight, sea, container ship, heavy fuel oil   GLO                  |                                                                                                                                          |
|                                                                                                |                                                                                                              |                        | 1,941                | transport, freight, lorry, 16-32 metric ton, diesel, EURO 6   transport, freight, lorry, 16-32 metric ton, diesel, EURO 6   RoW          |                                                                                                                                          |
|                                                                                                | St. Wendel, Germany                                                                                          | New York, NY           | 620                  | transport, freight, lorry, 16-32 metric ton, diesel, EURO 6   transport, freight, lorry, 16-32 metric ton, diesel, EURO 6   RER          |                                                                                                                                          |
|                                                                                                |                                                                                                              |                        | 6,636                | transport, freight, sea, container ship, heavy fuel oil   transport, freight, sea, container ship, heavy fuel oil   GLO                  |                                                                                                                                          |
|                                                                                                |                                                                                                              |                        | 32.2                 | transport, freight, lorry, 16-32 metric ton, diesel, EURO 6   transport, freight, lorry, 16-32 metric ton, diesel, EURO 6   RoW          |                                                                                                                                          |
|                                                                                                | Packaged concentrates/ blood tubing sets/dialyzers to dialysis center (sub-Saharan Africa patient scenarios) | St. Wendel, Germany    | Lagos, Nigeria       | 620                                                                                                                                      | transport, freight, lorry, 16-32 metric ton, diesel, EURO 6   transport, freight, lorry, 16-32 metric ton, diesel, EURO 6   RER          |
|                                                                                                |                                                                                                              |                        |                      | 8,104                                                                                                                                    | transport, freight, sea, container ship, heavy fuel oil   transport, freight, sea, container ship, heavy fuel oil   GLO                  |
|                                                                                                |                                                                                                              |                        |                      | 10.3                                                                                                                                     | transport, freight, lorry, 16-32 metric ton, diesel, unregulated   transport, freight, lorry, 16-32 metric ton, diesel, unregulated   ZA |
| St. Wendel, Germany                                                                            |                                                                                                              | Kinshasa, DRC          | 620                  | transport, freight, lorry, 16-32 metric ton, diesel, EURO 6   transport, freight, lorry, 16-32 metric ton, diesel, EURO 6   RER          |                                                                                                                                          |
|                                                                                                |                                                                                                              |                        | 9,366                | transport, freight, sea, container ship, heavy fuel oil   transport, freight, sea, container ship, heavy fuel oil   GLO                  |                                                                                                                                          |
|                                                                                                |                                                                                                              |                        | 580                  | transport, freight, lorry, 16-32 metric ton, diesel, unregulated   transport, freight, lorry, 16-32 metric ton, diesel, unregulated   ZA |                                                                                                                                          |
| St. Wendel, Germany                                                                            |                                                                                                              | Harare, Zimbabwe       | 620                  | transport, freight, lorry, 16-32 metric ton, diesel, EURO 6   transport, freight, lorry, 16-32 metric ton, diesel, EURO 6   RER          |                                                                                                                                          |
|                                                                                                |                                                                                                              |                        | 10,649               | transport, freight, sea, container ship, heavy fuel oil   transport, freight, sea, container ship, heavy fuel oil   GLO                  |                                                                                                                                          |
|                                                                                                |                                                                                                              |                        | 2,281                | transport, freight, lorry, 16-32 metric ton, diesel, unregulated   transport, freight, lorry, 16-32 metric ton, diesel, unregulated   ZA |                                                                                                                                          |
| St. Wendel, Germany                                                                            |                                                                                                              | Kigumo, Kenya          | 620                  | transport, freight, lorry, 16-32 metric ton, diesel, EURO 6   transport, freight, lorry, 16-32 metric ton, diesel, EURO 6   RER          |                                                                                                                                          |
|                                                                                                |                                                                                                              |                        | 11,979               | transport, freight, sea, container ship, heavy fuel oil   transport, freight, sea, container ship, heavy fuel oil   GLO                  |                                                                                                                                          |

|                                                                        |                                                                     |                                                                |                                      |                                                                                                                                                                                                                                                                                                                                                                                                                     |
|------------------------------------------------------------------------|---------------------------------------------------------------------|----------------------------------------------------------------|--------------------------------------|---------------------------------------------------------------------------------------------------------------------------------------------------------------------------------------------------------------------------------------------------------------------------------------------------------------------------------------------------------------------------------------------------------------------|
|                                                                        |                                                                     |                                                                | 569                                  | transport, freight, lorry, 16-32 metric ton, diesel, unregulated  <br>transport, freight, lorry, 16-32 metric ton, diesel, unregulated  <br>ZA                                                                                                                                                                                                                                                                      |
| Patient home to dialysis center (U.S. patient scenarios)               | near Fort Washakie, WY; Newton, MS; Minneapolis, MN; New York, NY   | Fort Washakie, WY; Newton, MS; Minneapolis, MN; New York, NY   | 10,<br>50,<br>100,<br>150,<br>OR 200 | transport, passenger, car, petrol, medium size, EURO 5  <br>transport, passenger, car, petrol, medium size, EURO 5   RoW                                                                                                                                                                                                                                                                                            |
| Patient home to dialysis center (sub-Saharan Africa patient scenarios) | near Lagos, Nigeria; Kinshasa, DRC; Harare, Zimbabwe; Kigumo, Kenya | Lagos, Nigeria; Kinshasa, DRC; Harare, Zimbabwe; Kigumo, Kenya | 10,<br>50,<br>100,<br>150,<br>OR 200 | transport, passenger, car, petrol, medium size, EURO 5  <br>transport, passenger, car, petrol, medium size, EURO 5   RoW<br>OR transport, passenger, motor scooter, fleet average  <br>transport, passenger, motor scooter, fleet average   RoW<br>OR transport, gasoline minibus jitney ( <i>emissions factor based on average value of modeled 2020 low and high scenarios from Prozzi et al.<sup>16)</sup></i> ) |

Note: all ecoinvent processes are allocation at the point of substitution, system (APOS, S)

**Table S11.** Home CAPD transportation details for various patient/dialysis center location scenarios. All other transportation processes not listed here are identical to the baseline CAPD scenario (Table S6).

| Transport process                                               | Starting location | Ending location   | Distance (km)                                                                                                           | ecoinvent process                                                                                                                              |
|-----------------------------------------------------------------|-------------------|-------------------|-------------------------------------------------------------------------------------------------------------------------|------------------------------------------------------------------------------------------------------------------------------------------------|
| Fluid to distribution center (U.S. patient scenarios)           | North Cove, NC    | Ogden, UT         | 3,146                                                                                                                   | transport, freight, lorry, 16-32 metric ton, diesel, EURO 6  <br>transport, freight, lorry, 16-32 metric ton, diesel, EURO 6   RoW             |
|                                                                 | North Cove, NC    | Dallas, TX        | 1,609                                                                                                                   | transport, freight, lorry, 16-32 metric ton, diesel, EURO 6  <br>transport, freight, lorry, 16-32 metric ton, diesel, EURO 6   RoW             |
|                                                                 | North Cove, NC    | Kenosha, WI       | 1,173                                                                                                                   | transport, freight, lorry, 16-32 metric ton, diesel, EURO 6  <br>transport, freight, lorry, 16-32 metric ton, diesel, EURO 6   RoW             |
|                                                                 | North Cove, NC    | Lebanon, PA       | 882                                                                                                                     | transport, freight, lorry, 16-32 metric ton, diesel, EURO 6  <br>transport, freight, lorry, 16-32 metric ton, diesel, EURO 6   RoW             |
| Fluid to patient home (U.S. patient scenarios)                  | Ogden, UT         | Fort Washakie, WY | 460                                                                                                                     | transport, freight, lorry, 3.5-7.5 metric ton, diesel, EURO 6  <br>transport, freight, lorry, 3.5-7.5 metric ton, diesel, EURO 6   RoW         |
|                                                                 | Dallas, TX        | Newton, MS        | 747                                                                                                                     | transport, freight, lorry, 3.5-7.5 metric ton, diesel, EURO 6  <br>transport, freight, lorry, 3.5-7.5 metric ton, diesel, EURO 6   RoW         |
|                                                                 | Kenosha, WI       | Minneapolis, MN   | 599                                                                                                                     | transport, freight, lorry, 3.5-7.5 metric ton, diesel, EURO 6  <br>transport, freight, lorry, 3.5-7.5 metric ton, diesel, EURO 6   RoW         |
|                                                                 | Lebanon, PA       | New York, NY      | 240                                                                                                                     | transport, freight, lorry, 3.5-7.5 metric ton, diesel, EURO 6  <br>transport, freight, lorry, 3.5-7.5 metric ton, diesel, EURO 6   RoW         |
| Fluid to dialysis center (sub-Saharan Africa patient scenarios) | North Cove, NC    | Lagos, Nigeria    | 505                                                                                                                     | transport, freight, lorry, 16-32 metric ton, diesel, EURO 6  <br>transport, freight, lorry, 16-32 metric ton, diesel, EURO 6   RoW             |
|                                                                 |                   |                   | 9,247                                                                                                                   | transport, freight, sea, container ship, heavy fuel oil   transport, freight, sea, container ship, heavy fuel oil   GLO                        |
|                                                                 | North Cove, NC    |                   | 10.3                                                                                                                    | transport, freight, lorry, 16-32 metric ton, diesel, unregulated  <br>transport, freight, lorry, 16-32 metric ton, diesel, unregulated  <br>ZA |
|                                                                 |                   | Kinshasa, DRC     | 505                                                                                                                     | transport, freight, lorry, 16-32 metric ton, diesel, EURO 6  <br>transport, freight, lorry, 16-32 metric ton, diesel, EURO 6   RoW             |
|                                                                 |                   | 10,497            | transport, freight, sea, container ship, heavy fuel oil   transport, freight, sea, container ship, heavy fuel oil   GLO |                                                                                                                                                |

|                                                                        |                                                                     |                                                                     |                          |                                                                                                                                                                                                                                                                                                                                                                                                                           |
|------------------------------------------------------------------------|---------------------------------------------------------------------|---------------------------------------------------------------------|--------------------------|---------------------------------------------------------------------------------------------------------------------------------------------------------------------------------------------------------------------------------------------------------------------------------------------------------------------------------------------------------------------------------------------------------------------------|
|                                                                        |                                                                     |                                                                     | 580                      | transport, freight, lorry, 16-32 metric ton, diesel, unregulated   transport, freight, lorry, 16-32 metric ton, diesel, unregulated   ZA                                                                                                                                                                                                                                                                                  |
|                                                                        | North Cove, NC                                                      | Harare, Zimbabwe                                                    | 505                      | transport, freight, lorry, 16-32 metric ton, diesel, EURO 6   transport, freight, lorry, 16-32 metric ton, diesel, EURO 6   RoW                                                                                                                                                                                                                                                                                           |
|                                                                        |                                                                     |                                                                     | 11,677                   | transport, freight, sea, container ship, heavy fuel oil   transport, freight, sea, container ship, heavy fuel oil   GLO                                                                                                                                                                                                                                                                                                   |
|                                                                        |                                                                     |                                                                     | 2,281                    | transport, freight, lorry, 16-32 metric ton, diesel, unregulated   transport, freight, lorry, 16-32 metric ton, diesel, unregulated   ZA                                                                                                                                                                                                                                                                                  |
|                                                                        | North Cove, NC                                                      | Kigumo, Kenya                                                       | 505                      | transport, freight, lorry, 16-32 metric ton, diesel, EURO 6   transport, freight, lorry, 16-32 metric ton, diesel, EURO 6   RoW                                                                                                                                                                                                                                                                                           |
|                                                                        |                                                                     |                                                                     | 15,649                   | transport, freight, sea, container ship, heavy fuel oil   transport, freight, sea, container ship, heavy fuel oil   GLO                                                                                                                                                                                                                                                                                                   |
|                                                                        |                                                                     |                                                                     | 569                      | transport, freight, lorry, 16-32 metric ton, diesel, unregulated   transport, freight, lorry, 16-32 metric ton, diesel, unregulated   ZA                                                                                                                                                                                                                                                                                  |
| Fluid to patient home (sub-Saharan Africa patient scenarios)           | Lagos, Nigeria; Kinshasa, DRC; Harare, Zimbabwe; Kigumo, Kenya      | near Lagos, Nigeria; Kinshasa, DRC; Harare, Zimbabwe; Kigumo, Kenya | 10, 50, 100, 150, OR 200 | transport, freight, lorry, 3.5-7.5 metric ton, diesel, unregulated   transport, freight, lorry, 3.5-7.5 metric ton, diesel, unregulated   ZA                                                                                                                                                                                                                                                                              |
| Patient home to dialysis center (U.S. patient scenarios)               | near Fort Washakie, WY; Newton, MS; Minneapolis, MN; New York, NY   | Fort Washakie, WY; Newton, MS; Minneapolis, MN; New York, NY        | 10, 50, 100, 150, OR 200 | transport, passenger, car, petrol, medium size, EURO 5   transport, passenger, car, petrol, medium size, EURO 5   RoW                                                                                                                                                                                                                                                                                                     |
| Patient home to dialysis center (sub-Saharan Africa patient scenarios) | near Lagos, Nigeria; Kinshasa, DRC; Harare, Zimbabwe; Kigumo, Kenya | Lagos, Nigeria; Kinshasa, DRC; Harare, Zimbabwe; Kigumo, Kenya      | 10, 50, 100, 150, OR 200 | transport, passenger, car, petrol, medium size, EURO 5   transport, passenger, car, petrol, medium size, EURO 5   RoW<br>OR transport, passenger, motor scooter, fleet average   RoW<br>OR transport, passenger, motor scooter, fleet average   RoW<br>OR transport, gasoline minibuses jitney ( <i>emissions factor based on average value of modeled 2020 low and high scenarios from Prozzi et al.<sup>16)</sup></i> ) |

Note: all ecoinvent processes are allocation at the point of substitution, system (APOS, S)

### S3.3. Patient Geography Sensitivity Analysis Results

The results for all patient location scenarios are shown in Figures S11-S18. The cutoff distance at which CAPD becomes less carbon intensive than ICHD with car transport varied from 19 km for the DRC and Kenya patients (Figs. S16 and S18) to 31 km for the Mississippi patient (Fig. S12). For the sub-Saharan Africa scenarios, motor scooter transport reduced the CFP of patient travel compared to car transport by ~60%. In this case, the cutoff distance at which CAPD becomes less carbon intensive than ICHD varied from 40 km for the Nigeria patient (Fig. S15) to 64 km for the Zimbabwe patient (Fig. S17). Public transport options, like minibuses, drastically reduced ICHD CFP, so it was less than CAPD for all patient distances. However, it should be noted that while the environmental benefits of public transport are

theoretically highest for very rural patients, these patients often have lease access to public transport options, and actual per-person emissions would increase with fewer individuals sharing a route.

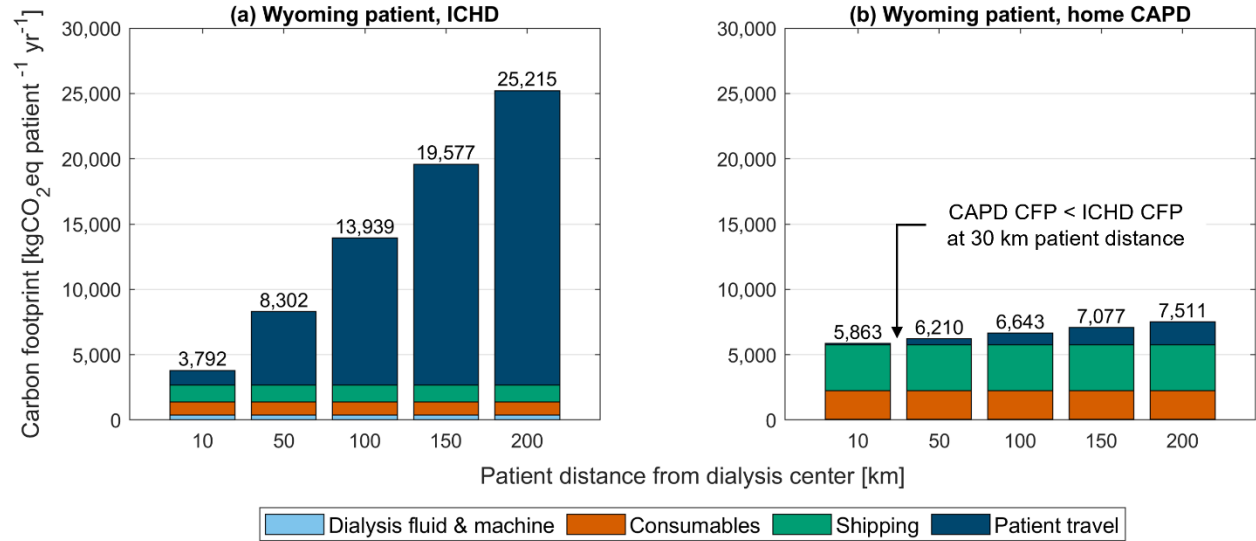

**Figure S11.** Annual per-patient CFP of (a) ICHD and (b) home CAPD for a patient living between 10 and 200 km from a dialysis center in Fort Washakie, Wyoming. Stacked bars show contributions from dialysis fluid and machine operation, consumables, shipping, and patient travel. The home CAPD CFP is less than ICHD for any patient travel distance above 30 km.

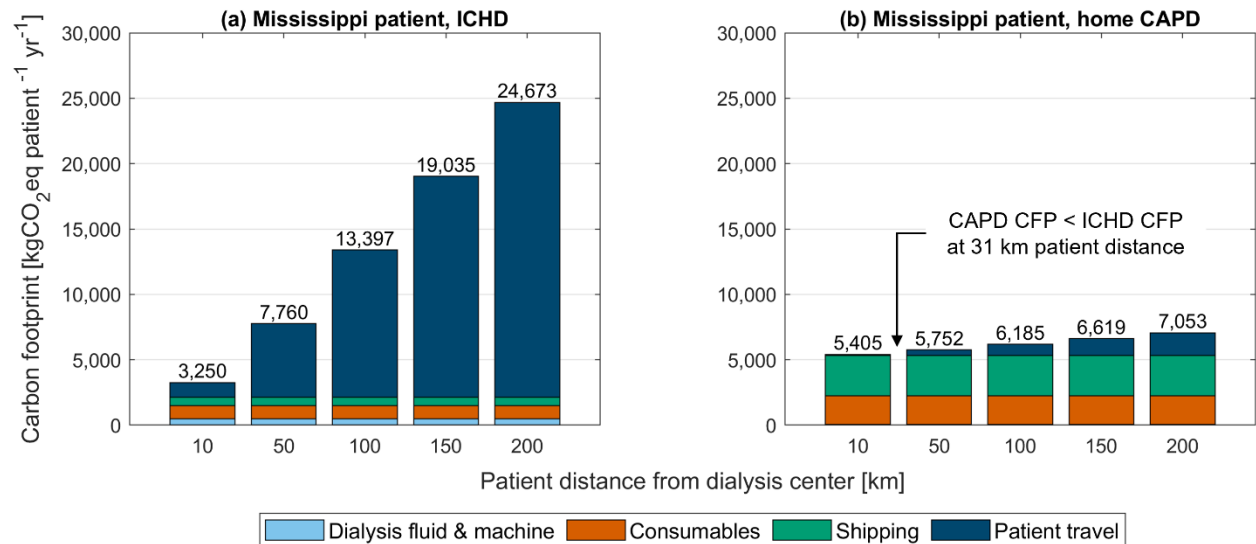

**Figure S12.** Annual per-patient CFP of (a) ICHD and (b) home CAPD for a patient living between 10 and 200 km from a dialysis center in Newton, Mississippi. Stacked bars show contributions from dialysis fluid and machine operation, consumables, shipping, and patient travel. The home CAPD CFP is less than ICHD for any patient travel distance above 31 km.

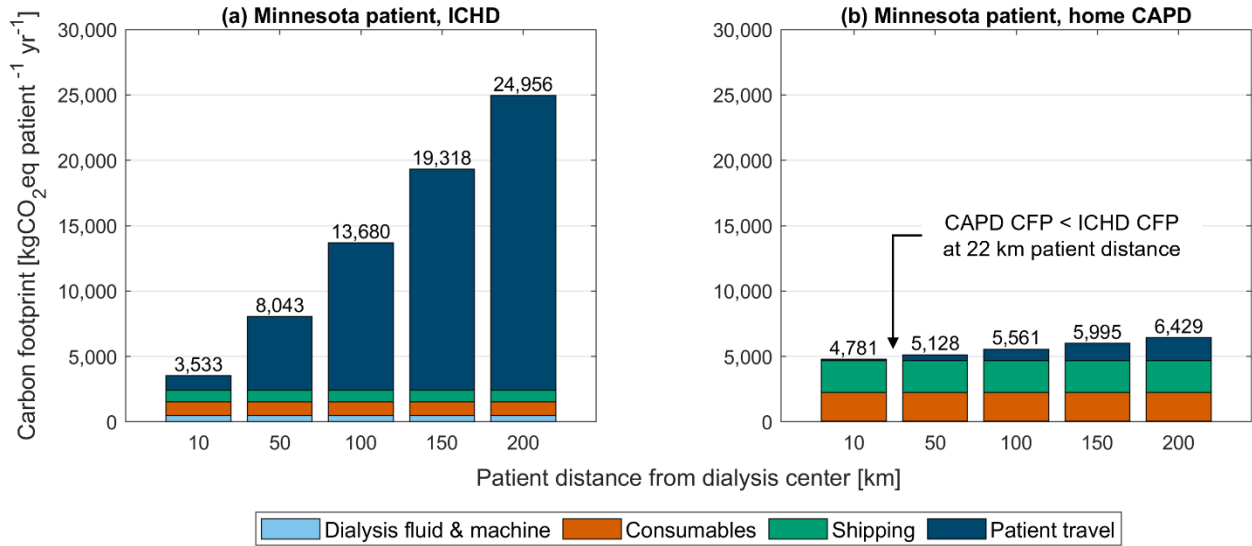

**Figure S13.** Annual per-patient CFP of (a) ICHD and (b) home CAPD for a patient living between 10 and 200 km from a dialysis center in Minneapolis, Minnesota. Stacked bars show contributions from dialysis fluid and machine operation, consumables, shipping, and patient travel. The home CAPD CFP is less than ICHD for any patient travel distance above 22 km.

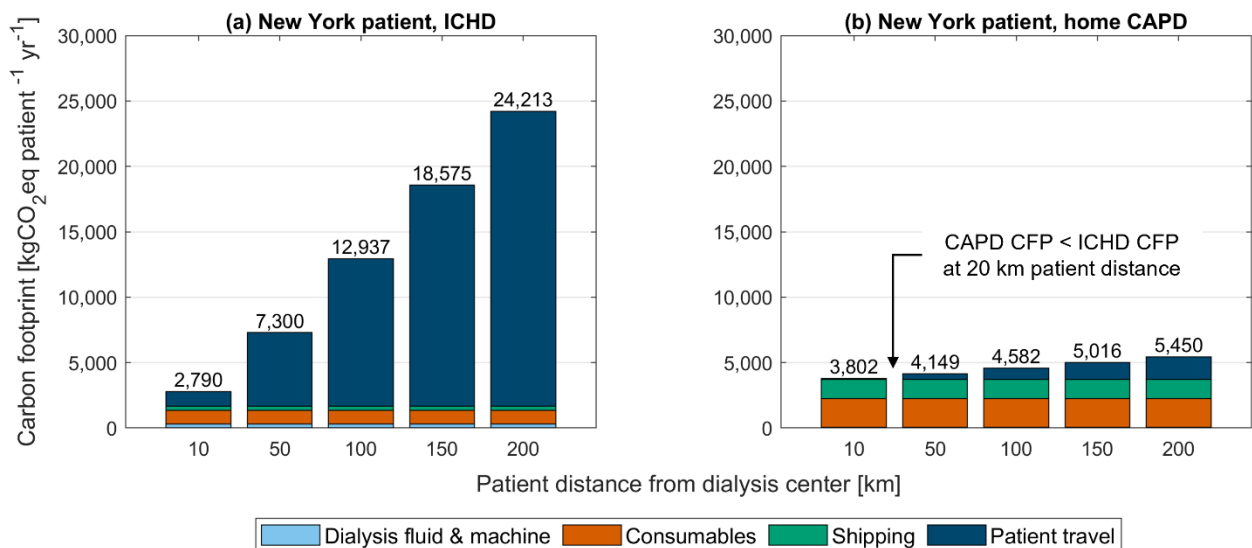

**Figure S14.** Annual per-patient CFP of (a) ICHD and (b) home CAPD for a patient living between 10 and 200 km from a dialysis center in New York, New York. Stacked bars show contributions from dialysis fluid and machine operation, consumables, shipping, and patient travel. The home CAPD CFP is less than ICHD for any patient travel distance above 20 km.

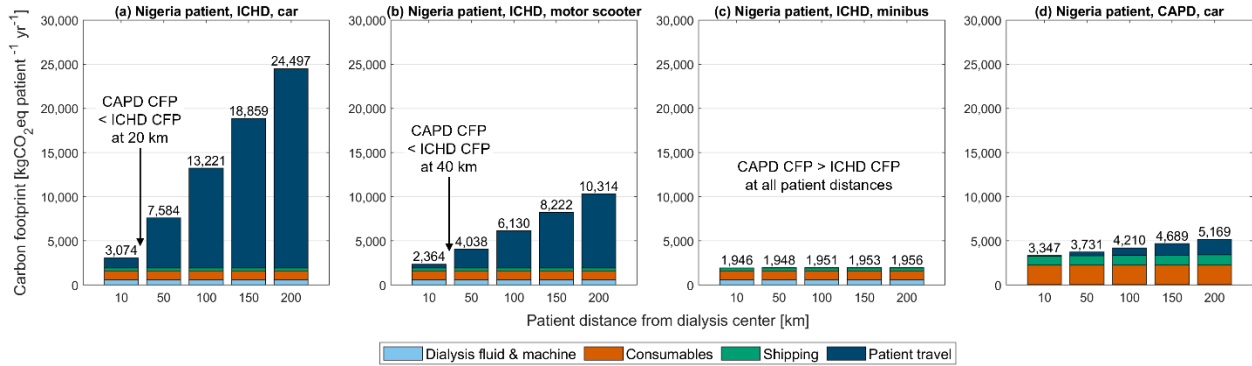

**Figure S15.** Annual per-patient CFP of (a) ICHD using personal car transport, (b) ICHD using personal motor scooter transport, (c) ICHD using public minibus transport, and (d) home CAPD using personal car transport for a patient living between 10 and 200 km from a dialysis center in Lagos, Nigeria. Stacked bars show contributions from dialysis fluid and machine operation, consumables, shipping, and patient travel. The home CAPD CFP using a personal car is less than the ICHD CFP using a personal car or motor scooter for any patient travel distance above 20 km or 40 km, respectively. The ICHD CFP using public minibus transport is less than the home CAPD CFP at all patient distances.

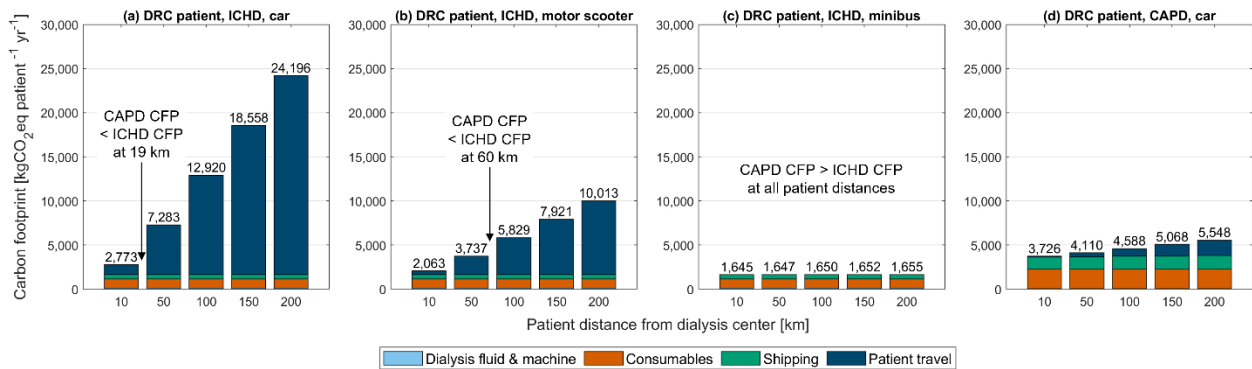

**Figure S16.** Annual per-patient CFP of (a) ICHD using personal car transport, (b) ICHD using personal motor scooter transport, (c) ICHD using public minibus transport, and (d) home CAPD using personal car transport for a patient living between 10 and 200 km from a dialysis center in Kinshasa, DRC. Stacked bars show contributions from dialysis fluid and machine operation, consumables, shipping, and patient travel. The home CAPD CFP using a personal car is less than the ICHD CFP using a personal car or motor scooter for any patient travel distance above 19 km or 60 km, respectively. The ICHD CFP using public minibus transport is less than the home CAPD CFP at all patient distances.

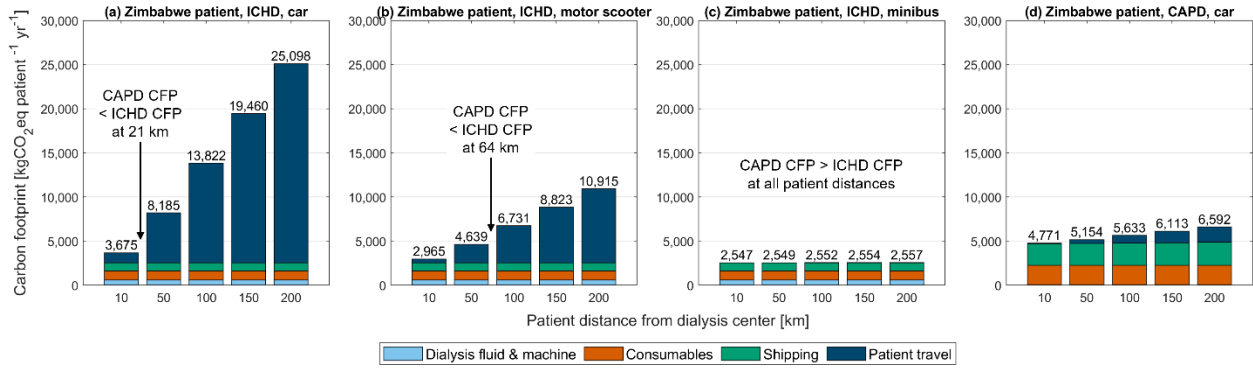

**Figure S17.** Annual per-patient CFP of (a) ICHD using personal car transport, (b) ICHD using personal motor scooter transport, (c) ICHD using public minibus transport, and (d) home CAPD using personal car transport for a patient living between 10 and 200 km from a dialysis center in Harare, Zimbabwe. Stacked bars show contributions from dialysis fluid and machine operation, consumables, shipping, and patient travel. The home CAPD CFP using a personal car is less than the ICHD CFP using a personal car or motor scooter for any patient travel distance above 21 km or 64 km, respectively. The ICHD CFP using public minibus transport is less than the home CAPD CFP at all patient distances.

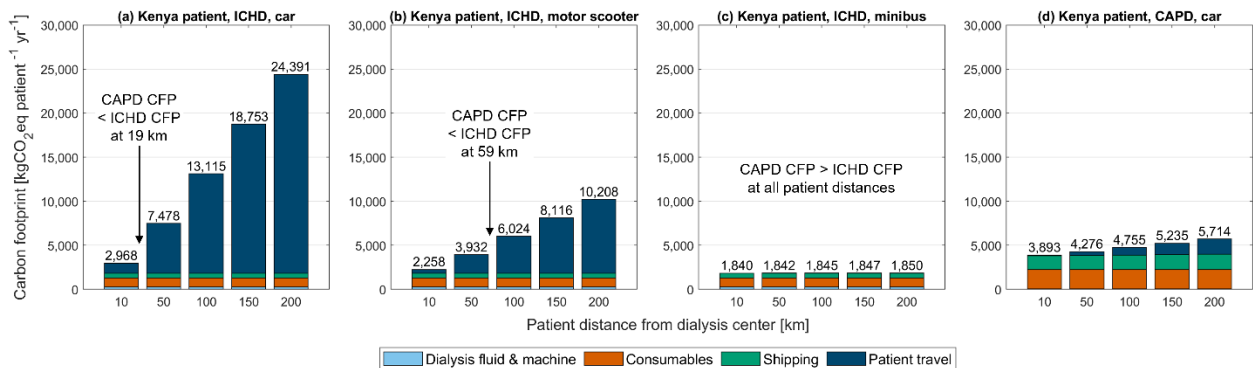

**Figure S18.** Annual per-patient CFP of (a) ICHD using personal car transport, (b) ICHD using personal motor scooter transport, (c) ICHD using public minibus transport, and (d) home CAPD using personal car transport for a patient living between 10 and 200 km from a dialysis center in Kigumo, Kenya. Stacked bars show contributions from dialysis fluid and machine operation, consumables, shipping, and patient travel. The home CAPD CFP using a personal car is less than the ICHD CFP using a personal car or motor scooter for any patient travel distance above 19 km or 59 km, respectively. The ICHD CFP using public minibus transport is less than the home CAPD CFP at all patient distances.

## **S4. PD Fluid Manufacturing Location Sensitivity Analysis**

### ***S4.1. Manufacturing Location Sensitivity Analysis Methods***

Because of the significant, yet variable, contribution of shipping to the home CAPD CFP a sensitivity analysis of PD fluid manufacturing location was conducted. For each of the nine patient locations, a CAPD LCA was conducted for six different centralized PD fluid manufacturing locations, selected as a globally distributed sample of current manufacturing facility locations. The manufacturing locations of the PD fluid inputs (solutes, cardboard packaging) were also varied with the fluid manufacturing scenarios. All locations are shown in Figure S19. The material and energy inventory were identical to the initial home CAPD baseline (Table S3), except for a few changes to the ecoinvent processes used:

- The water purification sub-process varied with manufacturing location (Table S12).
- The Friedberg, Germany, manufacturing scenario used RER material inputs for packaged solutes (blow molding, dextrose, sodium chloride, sodium lactate, calcium chloride, magnesium chloride). All other manufacturing scenarios used RoW inputs (same as baseline, Table S3).
- For corrugated cardboard, US geography processes were used in the North Cove, North Carolina, and Bloomington, Indiana, manufacturing scenarios (same as baseline, Table S3). RER geography processes were used in the Friedberg, Germany, manufacturing scenario. All other manufacturing scenarios used RoW geography processes.

The transportation distances and ecoinvent transport processes used for each transportation step in the manufacturing geography sensitivity analysis are included in Tables S13-S17. For the Navajo Nation and U.S. patient scenarios, we assumed that PD fluid was shipped from the manufacturer to a regional distribution center before delivery to the patient. For the sub-Saharan Africa patient scenarios, we assumed that PD fluid was shipped from the manufacturer to the local dialysis center before final delivery to the patient. Like the baseline LCA and patient travel sensitivity, land shipping was assumed to use a 16-32 metric ton truck at all stages, except for the final transportation of PD consumables from the distribution center or dialysis center to the patient home, which was assumed to use a 3.5-7.5 metric ton truck. All ocean shipping used container ship transport. RER geography processes were used for all transport in Europe, and ZA South Africa geography processes were used for all transport in sub-Saharan Africa. In all other cases, RoW or GLO processes were used. The distance between the patient and the dialysis center was held constant at 10 km, and patient travel was assumed to be via personal car. Because the long-distance land transport of packaged fluid dominates, differences in patient distance were determined to lead to only minor variation in the home CAPD CFP. Holding patient distance constant was therefore deemed a reasonable assumption.



|             |            |                                                                     |
|-------------|------------|---------------------------------------------------------------------|
| Feed water  | 2.174 L    | market for tap water   tap water   ZA                               |
| Electricity | 0.0189 kWh | market for electricity, low voltage   electricity, low voltage   ZA |
| Wastewater  | 1.174 L    | market for wastewater, average   wastewater, average   RoW          |

Note: all ecoinvent processes are allocation at the point of substitution, system (APOS, S)

**Table S13.** Transportation details for home CAPD with centralized PD fluid manufacturing in Bloomington, Indiana.

| Transport process                            | Starting location                 | Ending location   | Distance (km)                                                                                                                            | ecoinvent process                                                                                                                        |                                                                                                                                 |
|----------------------------------------------|-----------------------------------|-------------------|------------------------------------------------------------------------------------------------------------------------------------------|------------------------------------------------------------------------------------------------------------------------------------------|---------------------------------------------------------------------------------------------------------------------------------|
| Plastic to bag production                    | Jinshan District, Shanghai, China | Anyang, China     | 1,091                                                                                                                                    | transport, freight, lorry, 16-32 metric ton, diesel, EURO 6   transport, freight, lorry, 16-32 metric ton, diesel, EURO 6   RoW          |                                                                                                                                 |
|                                              |                                   |                   |                                                                                                                                          |                                                                                                                                          |                                                                                                                                 |
| Bags to fluid manufacturing                  | Anyang, China                     | Bloomington, IN   | 3,978                                                                                                                                    | transport, freight, lorry, 16-32 metric ton, diesel, EURO 6   transport, freight, lorry, 16-32 metric ton, diesel, EURO 6   RoW          |                                                                                                                                 |
|                                              |                                   |                   | 10,568                                                                                                                                   | transport, freight, sea, container ship, heavy fuel oil   transport, freight, sea, container ship, heavy fuel oil   GLO                  |                                                                                                                                 |
| HDPE to solute production                    | Jinshan District, Shanghai, China | New Brunswick, NJ | 175                                                                                                                                      | transport, freight, lorry, 16-32 metric ton, diesel, EURO 6   transport, freight, lorry, 16-32 metric ton, diesel, EURO 6   RoW          |                                                                                                                                 |
|                                              |                                   |                   | 19,598                                                                                                                                   | transport, freight, sea, container ship, heavy fuel oil   transport, freight, sea, container ship, heavy fuel oil   GLO                  |                                                                                                                                 |
| Solutes to fluid manufacturing               | New Brunswick, NJ                 | Bloomington, IN   | 1,204                                                                                                                                    | transport, freight, lorry, 16-32 metric ton, diesel, EURO 6   transport, freight, lorry, 16-32 metric ton, diesel, EURO 6   RoW          |                                                                                                                                 |
| Cardboard to fluid manufacturing             | Memphis, TN                       | Bloomington, IN   | 652                                                                                                                                      | transport, freight, lorry, 16-32 metric ton, diesel, EURO 6   transport, freight, lorry, 16-32 metric ton, diesel, EURO 6   RoW          |                                                                                                                                 |
| Fluid to distribution center/dialysis center | Bloomington, IN                   | Los Lunas, NM     | 2,217                                                                                                                                    | transport, freight, lorry, 16-32 metric ton, diesel, EURO 6   transport, freight, lorry, 16-32 metric ton, diesel, EURO 6   RoW          |                                                                                                                                 |
|                                              |                                   | Ogden, UT         | 2,415                                                                                                                                    | transport, freight, lorry, 16-32 metric ton, diesel, EURO 6   transport, freight, lorry, 16-32 metric ton, diesel, EURO 6   RoW          |                                                                                                                                 |
|                                              |                                   | Dallas, TX        | 1,398                                                                                                                                    | transport, freight, lorry, 16-32 metric ton, diesel, EURO 6   transport, freight, lorry, 16-32 metric ton, diesel, EURO 6   RoW          |                                                                                                                                 |
|                                              |                                   | Kenosha, WI       | 484                                                                                                                                      | transport, freight, lorry, 16-32 metric ton, diesel, EURO 6   transport, freight, lorry, 16-32 metric ton, diesel, EURO 6   RoW          |                                                                                                                                 |
|                                              |                                   | Lebanon, PA       | 1,002                                                                                                                                    | transport, freight, lorry, 16-32 metric ton, diesel, EURO 6   transport, freight, lorry, 16-32 metric ton, diesel, EURO 6   RoW          |                                                                                                                                 |
|                                              |                                   | Lagos, Nigeria    | 1,012                                                                                                                                    | transport, freight, lorry, 16-32 metric ton, diesel, EURO 6   transport, freight, lorry, 16-32 metric ton, diesel, EURO 6   RoW          |                                                                                                                                 |
|                                              |                                   |                   | 9,351                                                                                                                                    | transport, freight, sea, container ship, heavy fuel oil   transport, freight, sea, container ship, heavy fuel oil   GLO                  |                                                                                                                                 |
|                                              |                                   |                   | 10.3                                                                                                                                     | transport, freight, lorry, 16-32 metric ton, diesel, unregulated   transport, freight, lorry, 16-32 metric ton, diesel, unregulated   ZA |                                                                                                                                 |
|                                              |                                   |                   | Kinshasa, DRC                                                                                                                            | 1,012                                                                                                                                    | transport, freight, lorry, 16-32 metric ton, diesel, EURO 6   transport, freight, lorry, 16-32 metric ton, diesel, EURO 6   RoW |
|                                              |                                   |                   |                                                                                                                                          | 10,608                                                                                                                                   | transport, freight, sea, container ship, heavy fuel oil   transport, freight, sea, container ship, heavy fuel oil   GLO         |
|                                              |                                   | 580               | transport, freight, lorry, 16-32 metric ton, diesel, unregulated   transport, freight, lorry, 16-32 metric ton, diesel, unregulated   ZA |                                                                                                                                          |                                                                                                                                 |
|                                              | Harare, Zimbabwe                  | 1,012             | transport, freight, lorry, 16-32 metric ton, diesel, EURO 6   transport, freight, lorry, 16-32 metric ton, diesel, EURO 6   RoW          |                                                                                                                                          |                                                                                                                                 |
|                                              |                                   | 11,825            | transport, freight, sea, container ship, heavy fuel oil   transport, freight, sea, container ship, heavy fuel oil   GLO                  |                                                                                                                                          |                                                                                                                                 |

|               |        |                                                                                                                                          |
|---------------|--------|------------------------------------------------------------------------------------------------------------------------------------------|
|               | 2,281  | transport, freight, lorry, 16-32 metric ton, diesel, unregulated   transport, freight, lorry, 16-32 metric ton, diesel, unregulated   ZA |
| Kigumo, Kenya | 1,012  | transport, freight, lorry, 16-32 metric ton, diesel, EURO 6   transport, freight, lorry, 16-32 metric ton, diesel, EURO 6   RoW          |
|               | 15,533 | transport, freight, sea, container ship, heavy fuel oil   transport, freight, sea, container ship, heavy fuel oil   GLO                  |
|               | 569    | transport, freight, lorry, 16-32 metric ton, diesel, unregulated   transport, freight, lorry, 16-32 metric ton, diesel, unregulated   ZA |

Note: all ecoinvent processes are allocation at the point of substitution, system (APOS, S)

**Table S14.** Transportation details for home CAPD with centralized PD fluid manufacturing in Friedberg, Germany.

| Transport process                            | Starting location                 | Ending location          | Distance (km) | ecoinvent process                                                                                                               |
|----------------------------------------------|-----------------------------------|--------------------------|---------------|---------------------------------------------------------------------------------------------------------------------------------|
| Plastic to bag production                    | Jinshan District, Shanghai, China | Anyang, China            | 1,091         | transport, freight, lorry, 16-32 metric ton, diesel, EURO 6   transport, freight, lorry, 16-32 metric ton, diesel, EURO 6   RoW |
| Bags to fluid manufacturing                  | Anyang, China                     | Friedberg, Germany       | 651           | transport, freight, lorry, 16-32 metric ton, diesel, EURO 6   transport, freight, lorry, 16-32 metric ton, diesel, EURO 6   RoW |
|                                              |                                   |                          | 20,291        | transport, freight, sea, container ship, heavy fuel oil   transport, freight, sea, container ship, heavy fuel oil   GLO         |
|                                              |                                   |                          | 494           | transport, freight, lorry, 16-32 metric ton, diesel, EURO 6   transport, freight, lorry, 16-32 metric ton, diesel, EURO 6   RER |
| HDPE to solute production                    | Jinshan District, Shanghai, China | Haarlem, The Netherlands | 125           | transport, freight, lorry, 16-32 metric ton, diesel, EURO 6   transport, freight, lorry, 16-32 metric ton, diesel, EURO 6   RoW |
|                                              |                                   |                          | 19,544        | transport, freight, sea, container ship, heavy fuel oil   transport, freight, sea, container ship, heavy fuel oil   GLO         |
|                                              |                                   |                          | 17            | transport, freight, lorry, 16-32 metric ton, diesel, EURO 6   transport, freight, lorry, 16-32 metric ton, diesel, EURO 6   RER |
| Solutes to fluid manufacturing               | Haarlem, The Netherlands          | Friedberg, Germany       | 455           | transport, freight, lorry, 16-32 metric ton, diesel, EURO 6   transport, freight, lorry, 16-32 metric ton, diesel, EURO 6   RER |
| Cardboard to fluid manufacturing             | Werra-Suhl-Tal, Germany           | Friedberg, Germany       | 146           | transport, freight, lorry, 16-32 metric ton, diesel, EURO 6   transport, freight, lorry, 16-32 metric ton, diesel, EURO 6   RER |
| Fluid to distribution center/dialysis center | Friedberg, Germany                | Los Lunas, NM            | 494           | transport, freight, lorry, 16-32 metric ton, diesel, EURO 6   transport, freight, lorry, 16-32 metric ton, diesel, EURO 6   RER |
|                                              |                                   |                          | 7,434         | transport, freight, sea, container ship, heavy fuel oil   transport, freight, sea, container ship, heavy fuel oil   GLO         |
|                                              |                                   |                          | 2,774         | transport, freight, lorry, 16-32 metric ton, diesel, EURO 6   transport, freight, lorry, 16-32 metric ton, diesel, EURO 6   RoW |
|                                              |                                   | Ogden, UT                | 494           | transport, freight, lorry, 16-32 metric ton, diesel, EURO 6   transport, freight, lorry, 16-32 metric ton, diesel, EURO 6   RER |
|                                              |                                   |                          | 6,636         | transport, freight, sea, container ship, heavy fuel oil   transport, freight, sea, container ship, heavy fuel oil   GLO         |
|                                              |                                   |                          | 3,483         | transport, freight, lorry, 16-32 metric ton, diesel, EURO 6   transport, freight, lorry, 16-32 metric ton, diesel, EURO 6   RoW |
|                                              |                                   | Dallas, TX               | 494           | transport, freight, lorry, 16-32 metric ton, diesel, EURO 6   transport, freight, lorry, 16-32 metric ton, diesel, EURO 6   RER |
|                                              |                                   |                          | 7,434         | transport, freight, sea, container ship, heavy fuel oil   transport, freight, sea, container ship, heavy fuel oil   GLO         |

|                  |  |        |                                                                                                                                          |
|------------------|--|--------|------------------------------------------------------------------------------------------------------------------------------------------|
|                  |  | 1,749  | transport, freight, lorry, 16-32 metric ton, diesel, EURO 6   transport, freight, lorry, 16-32 metric ton, diesel, EURO 6   RoW          |
| Kenosha, WI      |  | 494    | transport, freight, lorry, 16-32 metric ton, diesel, EURO 6   transport, freight, lorry, 16-32 metric ton, diesel, EURO 6   RER          |
|                  |  | 6,636  | transport, freight, sea, container ship, heavy fuel oil   transport, freight, sea, container ship, heavy fuel oil   GLO                  |
| Lebanon, PA      |  | 1,395  | transport, freight, lorry, 16-32 metric ton, diesel, EURO 6   transport, freight, lorry, 16-32 metric ton, diesel, EURO 6   RoW          |
|                  |  | 494    | transport, freight, lorry, 16-32 metric ton, diesel, EURO 6   transport, freight, lorry, 16-32 metric ton, diesel, EURO 6   RER          |
| Lagos, Nigeria   |  | 6,636  | transport, freight, sea, container ship, heavy fuel oil   transport, freight, sea, container ship, heavy fuel oil   GLO                  |
|                  |  | 233    | transport, freight, lorry, 16-32 metric ton, diesel, EURO 6   transport, freight, lorry, 16-32 metric ton, diesel, EURO 6   RoW          |
| Kinshasa, DRC    |  | 494    | transport, freight, lorry, 16-32 metric ton, diesel, EURO 6   transport, freight, lorry, 16-32 metric ton, diesel, EURO 6   RER          |
|                  |  | 9,366  | transport, freight, sea, container ship, heavy fuel oil   transport, freight, sea, container ship, heavy fuel oil   GLO                  |
| Harare, Zimbabwe |  | 580    | transport, freight, lorry, 16-32 metric ton, diesel, unregulated   transport, freight, lorry, 16-32 metric ton, diesel, unregulated   ZA |
|                  |  | 494    | transport, freight, lorry, 16-32 metric ton, diesel, EURO 6   transport, freight, lorry, 16-32 metric ton, diesel, EURO 6   RER          |
| Kigumo, Kenya    |  | 10,649 | transport, freight, sea, container ship, heavy fuel oil   transport, freight, sea, container ship, heavy fuel oil   GLO                  |
|                  |  | 2,281  | transport, freight, lorry, 16-32 metric ton, diesel, unregulated   transport, freight, lorry, 16-32 metric ton, diesel, unregulated   ZA |
|                  |  | 494    | transport, freight, lorry, 16-32 metric ton, diesel, EURO 6   transport, freight, lorry, 16-32 metric ton, diesel, EURO 6   RER          |
|                  |  | 11,979 | transport, freight, sea, container ship, heavy fuel oil   transport, freight, sea, container ship, heavy fuel oil   GLO                  |
|                  |  | 569    | transport, freight, lorry, 16-32 metric ton, diesel, unregulated   transport, freight, lorry, 16-32 metric ton, diesel, unregulated   ZA |

Note: all ecoinvent processes are allocation at the point of substitution, system (APOS, S)

**Table S15.** Transportation details for home CAPD with centralized PD fluid manufacturing in Guangzhou, China.

| Transport process           | Starting location                 | Ending location                  | Distance (km) | ecoinvent process                                                                                                               |
|-----------------------------|-----------------------------------|----------------------------------|---------------|---------------------------------------------------------------------------------------------------------------------------------|
| Plastic to bag production   | Jinshan District, Shanghai, China | Anyang, China                    | 1,091         | transport, freight, lorry, 16-32 metric ton, diesel, EURO 6   transport, freight, lorry, 16-32 metric ton, diesel, EURO 6   RoW |
| Bags to fluid manufacturing | Anyang, China                     | Liwan District, Guangzhou, China | 1,627         | transport, freight, lorry, 16-32 metric ton, diesel, EURO 6   transport, freight, lorry, 16-32 metric ton, diesel, EURO 6   RoW |

|                                              |                                   |                                                                                                                                          |                                                                                                                                 |                                                                                                                                          |
|----------------------------------------------|-----------------------------------|------------------------------------------------------------------------------------------------------------------------------------------|---------------------------------------------------------------------------------------------------------------------------------|------------------------------------------------------------------------------------------------------------------------------------------|
| HDPE to solute production                    | Jinshan District, Shanghai, China | Laoshan District, Qingdao, China                                                                                                         | 764                                                                                                                             | transport, freight, lorry, 16-32 metric ton, diesel, EURO 6   transport, freight, lorry, 16-32 metric ton, diesel, EURO 6   RoW          |
| Solutes to fluid manufacturing               | Laoshan District, Qingdao, China  | Liwan District, Guangzhou, China                                                                                                         | 1,907                                                                                                                           | transport, freight, lorry, 16-32 metric ton, diesel, EURO 6   transport, freight, lorry, 16-32 metric ton, diesel, EURO 6   RoW          |
| Cardboard to fluid manufacturing             | Zhongshan City, Guangdong, China  | Liwan District, Guangzhou, China                                                                                                         | 85.6                                                                                                                            | transport, freight, lorry, 16-32 metric ton, diesel, EURO 6   transport, freight, lorry, 16-32 metric ton, diesel, EURO 6   RoW          |
| Fluid to distribution center/dialysis center | Liwan District, Guangzhou, China  | Los Lunas, NM                                                                                                                            | 1,332                                                                                                                           | transport, freight, lorry, 16-32 metric ton, diesel, EURO 6   transport, freight, lorry, 16-32 metric ton, diesel, EURO 6   RoW          |
|                                              |                                   | Ogden, UT                                                                                                                                | 1,227                                                                                                                           | transport, freight, lorry, 16-32 metric ton, diesel, EURO 6   transport, freight, lorry, 16-32 metric ton, diesel, EURO 6   RoW          |
|                                              |                                   |                                                                                                                                          | 11,938                                                                                                                          | transport, freight, sea, container ship, heavy fuel oil   transport, freight, sea, container ship, heavy fuel oil   GLO                  |
|                                              |                                   | Dallas, TX                                                                                                                               | 2,367                                                                                                                           | transport, freight, lorry, 16-32 metric ton, diesel, EURO 6   transport, freight, lorry, 16-32 metric ton, diesel, EURO 6   RoW          |
|                                              |                                   |                                                                                                                                          | 11,938                                                                                                                          | transport, freight, sea, container ship, heavy fuel oil   transport, freight, sea, container ship, heavy fuel oil   GLO                  |
|                                              |                                   | Kenosha, WI                                                                                                                              | 3,366                                                                                                                           | transport, freight, lorry, 16-32 metric ton, diesel, EURO 6   transport, freight, lorry, 16-32 metric ton, diesel, EURO 6   RoW          |
|                                              |                                   |                                                                                                                                          | 11,938                                                                                                                          | transport, freight, sea, container ship, heavy fuel oil   transport, freight, sea, container ship, heavy fuel oil   GLO                  |
|                                              |                                   | Lebanon, PA                                                                                                                              | 4,310                                                                                                                           | transport, freight, lorry, 16-32 metric ton, diesel, EURO 6   transport, freight, lorry, 16-32 metric ton, diesel, EURO 6   RoW          |
|                                              |                                   |                                                                                                                                          | 11,938                                                                                                                          | transport, freight, sea, container ship, heavy fuel oil   transport, freight, sea, container ship, heavy fuel oil   GLO                  |
|                                              |                                   | Lagos, Nigeria                                                                                                                           | 36.4                                                                                                                            | transport, freight, lorry, 16-32 metric ton, diesel, EURO 6   transport, freight, lorry, 16-32 metric ton, diesel, EURO 6   RoW          |
|                                              |                                   |                                                                                                                                          | 16,867                                                                                                                          | transport, freight, sea, container ship, heavy fuel oil   transport, freight, sea, container ship, heavy fuel oil   GLO                  |
|                                              |                                   |                                                                                                                                          | 10.3                                                                                                                            | transport, freight, lorry, 16-32 metric ton, diesel, unregulated   transport, freight, lorry, 16-32 metric ton, diesel, unregulated   ZA |
|                                              |                                   | Kinshasa, DRC                                                                                                                            | 36.4                                                                                                                            | transport, freight, lorry, 16-32 metric ton, diesel, EURO 6   transport, freight, lorry, 16-32 metric ton, diesel, EURO 6   RoW          |
|                                              |                                   |                                                                                                                                          | 15,385                                                                                                                          | transport, freight, sea, container ship, heavy fuel oil   transport, freight, sea, container ship, heavy fuel oil   GLO                  |
|                                              | 580                               | transport, freight, lorry, 16-32 metric ton, diesel, unregulated   transport, freight, lorry, 16-32 metric ton, diesel, unregulated   ZA |                                                                                                                                 |                                                                                                                                          |
| Harare, Zimbabwe                             | 36.4                              | transport, freight, lorry, 16-32 metric ton, diesel, EURO 6   transport, freight, lorry, 16-32 metric ton, diesel, EURO 6   RoW          |                                                                                                                                 |                                                                                                                                          |
|                                              | 11,314                            | transport, freight, sea, container ship, heavy fuel oil   transport, freight, sea, container ship, heavy fuel oil   GLO                  |                                                                                                                                 |                                                                                                                                          |
|                                              | 1,662                             | transport, freight, lorry, 16-32 metric ton, diesel, unregulated   transport, freight, lorry, 16-32 metric ton, diesel, unregulated   ZA |                                                                                                                                 |                                                                                                                                          |
|                                              | Kigumo, Kenya                     | 36.4                                                                                                                                     | transport, freight, lorry, 16-32 metric ton, diesel, EURO 6   transport, freight, lorry, 16-32 metric ton, diesel, EURO 6   RoW |                                                                                                                                          |

|        |                                                                                                                                          |
|--------|------------------------------------------------------------------------------------------------------------------------------------------|
| 12,047 | transport, freight, sea, container ship, heavy fuel oil   transport, freight, sea, container ship, heavy fuel oil   GLO                  |
| 569    | transport, freight, lorry, 16-32 metric ton, diesel, unregulated   transport, freight, lorry, 16-32 metric ton, diesel, unregulated   ZA |

Note: all ecoinvent processes are allocation at the point of substitution, system (APOS, S)

**Table S16.** Transportation details for home CAPD with centralized PD fluid manufacturing in Sydney, Australia.

| Transport process                            | Starting location                 | Ending location             | Distance (km) | ecoinvent process                                                                                                               |
|----------------------------------------------|-----------------------------------|-----------------------------|---------------|---------------------------------------------------------------------------------------------------------------------------------|
| Plastic to bag production                    | Jinshan District, Shanghai, China | Anyang, China               | 1,091         | transport, freight, lorry, 16-32 metric ton, diesel, EURO 6   transport, freight, lorry, 16-32 metric ton, diesel, EURO 6   RoW |
| Bags to fluid manufacturing                  | Anyang, China                     | Sydney, Australia           | 687           | transport, freight, lorry, 16-32 metric ton, diesel, EURO 6   transport, freight, lorry, 16-32 metric ton, diesel, EURO 6   RoW |
|                                              |                                   |                             | 9,010         | transport, freight, sea, container ship, heavy fuel oil   transport, freight, sea, container ship, heavy fuel oil   GLO         |
| HDPE to solute production                    | Jinshan District, Shanghai, China | Taren Point, NSW, Australia | 157           | transport, freight, lorry, 16-32 metric ton, diesel, EURO 6   transport, freight, lorry, 16-32 metric ton, diesel, EURO 6   RoW |
|                                              |                                   |                             | 8,578         | transport, freight, sea, container ship, heavy fuel oil   transport, freight, sea, container ship, heavy fuel oil   GLO         |
| Solutes to fluid manufacturing               | Taren Point, NSW, Australia       | Sydney, Australia           | 44            | transport, freight, lorry, 16-32 metric ton, diesel, EURO 6   transport, freight, lorry, 16-32 metric ton, diesel, EURO 6   RoW |
| Cardboard to fluid manufacturing             | Warwick Farm, NSW, Australia      | Sydney, Australia           | 18            | transport, freight, lorry, 16-32 metric ton, diesel, EURO 6   transport, freight, lorry, 16-32 metric ton, diesel, EURO 6   RoW |
| Fluid to distribution center/dialysis center | Sydney, Australia                 | Los Lunas, NM               | 1,332         | transport, freight, lorry, 16-32 metric ton, diesel, EURO 6   transport, freight, lorry, 16-32 metric ton, diesel, EURO 6   RoW |
|                                              |                                   |                             | 12,057        | transport, freight, sea, container ship, heavy fuel oil   transport, freight, sea, container ship, heavy fuel oil   GLO         |
|                                              |                                   | Ogden, UT                   | 1,227         | transport, freight, lorry, 16-32 metric ton, diesel, EURO 6   transport, freight, lorry, 16-32 metric ton, diesel, EURO 6   RoW |
|                                              |                                   |                             | 12,057        | transport, freight, sea, container ship, heavy fuel oil   transport, freight, sea, container ship, heavy fuel oil   GLO         |
|                                              |                                   | Dallas, TX                  | 2,366         | transport, freight, lorry, 16-32 metric ton, diesel, EURO 6   transport, freight, lorry, 16-32 metric ton, diesel, EURO 6   RoW |
|                                              |                                   |                             | 12,057        | transport, freight, sea, container ship, heavy fuel oil   transport, freight, sea, container ship, heavy fuel oil   GLO         |
|                                              |                                   | Kenosha, WI                 | 3,365         | transport, freight, lorry, 16-32 metric ton, diesel, EURO 6   transport, freight, lorry, 16-32 metric ton, diesel, EURO 6   RoW |
|                                              |                                   |                             | 12,057        | transport, freight, sea, container ship, heavy fuel oil   transport, freight, sea, container ship, heavy fuel oil   GLO         |
|                                              |                                   | Lebanon, PA                 | 4,310         | transport, freight, lorry, 16-32 metric ton, diesel, EURO 6   transport, freight, lorry, 16-32 metric ton, diesel, EURO 6   RoW |
|                                              |                                   |                             | 12,057        | transport, freight, sea, container ship, heavy fuel oil   transport, freight, sea, container ship, heavy fuel oil   GLO         |
|                                              |                                   | Lagos, Nigeria              | 36.4          | transport, freight, lorry, 16-32 metric ton, diesel, EURO 6   transport, freight, lorry, 16-32 metric ton, diesel, EURO 6   RoW |
|                                              |                                   |                             | 16,887        | transport, freight, sea, container ship, heavy fuel oil   transport, freight, sea, container ship, heavy fuel oil   GLO         |

|                  |  |        |                                                                                                                                          |
|------------------|--|--------|------------------------------------------------------------------------------------------------------------------------------------------|
|                  |  | 10.3   | transport, freight, lorry, 16-32 metric ton, diesel, unregulated   transport, freight, lorry, 16-32 metric ton, diesel, unregulated   ZA |
| Kinshasa, DRC    |  | 36.4   | transport, freight, lorry, 16-32 metric ton, diesel, EURO 6   transport, freight, lorry, 16-32 metric ton, diesel, EURO 6   RoW          |
|                  |  | 15,385 | transport, freight, sea, container ship, heavy fuel oil   transport, freight, sea, container ship, heavy fuel oil   GLO                  |
| Harare, Zimbabwe |  | 580    | transport, freight, lorry, 16-32 metric ton, diesel, unregulated   transport, freight, lorry, 16-32 metric ton, diesel, unregulated   ZA |
|                  |  | 36.4   | transport, freight, lorry, 16-32 metric ton, diesel, EURO 6   transport, freight, lorry, 16-32 metric ton, diesel, EURO 6   RoW          |
|                  |  | 11,314 | transport, freight, sea, container ship, heavy fuel oil   transport, freight, sea, container ship, heavy fuel oil   GLO                  |
| Kigumo, Kenya    |  | 1,662  | transport, freight, lorry, 16-32 metric ton, diesel, unregulated   transport, freight, lorry, 16-32 metric ton, diesel, unregulated   ZA |
|                  |  | 36.4   | transport, freight, lorry, 16-32 metric ton, diesel, EURO 6   transport, freight, lorry, 16-32 metric ton, diesel, EURO 6   RoW          |
|                  |  | 12,047 | transport, freight, sea, container ship, heavy fuel oil   transport, freight, sea, container ship, heavy fuel oil   GLO                  |
|                  |  | 569    | transport, freight, lorry, 16-32 metric ton, diesel, unregulated   transport, freight, lorry, 16-32 metric ton, diesel, unregulated   ZA |

Note: all ecoinvent processes are allocation at the point of substitution, system (APOS, S)

**Table S17.** Transportation details for home CAPD with centralized PD fluid manufacturing in Johannesburg, South Africa.

| Transport process                | Starting location                  | Ending location                    | Distance (km) | ecoinvent process                                                                                                                        |
|----------------------------------|------------------------------------|------------------------------------|---------------|------------------------------------------------------------------------------------------------------------------------------------------|
| Plastic to bag production        | Jinshan District, Shanghai, China  | Anyang, China                      | 1,091         | transport, freight, lorry, 16-32 metric ton, diesel, EURO 6   transport, freight, lorry, 16-32 metric ton, diesel, EURO 6   RoW          |
| Bags to fluid manufacturing      | Anyang, China                      | Johannesburg, South Africa         | 651           | transport, freight, lorry, 16-32 metric ton, diesel, EURO 6   transport, freight, lorry, 16-32 metric ton, diesel, EURO 6   RoW          |
|                                  |                                    |                                    | 11,314        | transport, freight, sea, container ship, heavy fuel oil   transport, freight, sea, container ship, heavy fuel oil   GLO                  |
|                                  |                                    |                                    | 580           | transport, freight, lorry, 16-32 metric ton, diesel, unregulated   transport, freight, lorry, 16-32 metric ton, diesel, unregulated   ZA |
| HDPE to solute production        | Jinshan District, Shanghai, China  | Isando, Kempton Park, South Africa | 125           | transport, freight, lorry, 16-32 metric ton, diesel, EURO 6   transport, freight, lorry, 16-32 metric ton, diesel, EURO 6   RoW          |
|                                  |                                    |                                    | 12,992        | transport, freight, sea, container ship, heavy fuel oil   transport, freight, sea, container ship, heavy fuel oil   GLO                  |
|                                  |                                    |                                    | 577           | transport, freight, lorry, 16-32 metric ton, diesel, unregulated   transport, freight, lorry, 16-32 metric ton, diesel, unregulated   ZA |
| Solutes to fluid manufacturing   | Isando, Kempton Park, South Africa | Johannesburg, South Africa         | 33.8          | transport, freight, lorry, 16-32 metric ton, diesel, unregulated   transport, freight, lorry, 16-32 metric ton, diesel, unregulated   ZA |
| Cardboard to fluid manufacturing | Gauteng, South Africa              | Johannesburg, South Africa         | 21.6          | transport, freight, lorry, 16-32 metric ton, diesel, unregulated   transport, freight, lorry, 16-32 metric ton, diesel, unregulated   ZA |

|                                              |                            |                                                                                                                                 |        |                                                                                                                                          |
|----------------------------------------------|----------------------------|---------------------------------------------------------------------------------------------------------------------------------|--------|------------------------------------------------------------------------------------------------------------------------------------------|
| Fluid to distribution center/dialysis center | Johannesburg, South Africa | Los Lunas, NM                                                                                                                   | 1,390  | transport, freight, lorry, 16-32 metric ton, diesel, unregulated   transport, freight, lorry, 16-32 metric ton, diesel, unregulated   ZA |
|                                              |                            |                                                                                                                                 | 12,649 | transport, freight, sea, container ship, heavy fuel oil   transport, freight, sea, container ship, heavy fuel oil   GLO                  |
|                                              |                            |                                                                                                                                 | 2,774  | transport, freight, lorry, 16-32 metric ton, diesel, EURO 6   transport, freight, lorry, 16-32 metric ton, diesel, EURO 6   RoW          |
|                                              |                            | Ogden, UT                                                                                                                       | 1,390  | transport, freight, lorry, 16-32 metric ton, diesel, unregulated   transport, freight, lorry, 16-32 metric ton, diesel, unregulated   ZA |
|                                              |                            |                                                                                                                                 | 12,573 | transport, freight, sea, container ship, heavy fuel oil   transport, freight, sea, container ship, heavy fuel oil   GLO                  |
|                                              |                            |                                                                                                                                 | 3,483  | transport, freight, lorry, 16-32 metric ton, diesel, EURO 6   transport, freight, lorry, 16-32 metric ton, diesel, EURO 6   RoW          |
|                                              |                            | Dallas, TX                                                                                                                      | 1,390  | transport, freight, lorry, 16-32 metric ton, diesel, unregulated   transport, freight, lorry, 16-32 metric ton, diesel, unregulated   ZA |
|                                              |                            |                                                                                                                                 | 12,649 | transport, freight, sea, container ship, heavy fuel oil   transport, freight, sea, container ship, heavy fuel oil   GLO                  |
|                                              |                            |                                                                                                                                 | 1,479  | transport, freight, lorry, 16-32 metric ton, diesel, EURO 6   transport, freight, lorry, 16-32 metric ton, diesel, EURO 6   RoW          |
|                                              |                            | Kenosha, WI                                                                                                                     | 1,390  | transport, freight, lorry, 16-32 metric ton, diesel, unregulated   transport, freight, lorry, 16-32 metric ton, diesel, unregulated   ZA |
|                                              |                            |                                                                                                                                 | 12,573 | transport, freight, sea, container ship, heavy fuel oil   transport, freight, sea, container ship, heavy fuel oil   GLO                  |
|                                              |                            |                                                                                                                                 | 1,395  | transport, freight, lorry, 16-32 metric ton, diesel, EURO 6   transport, freight, lorry, 16-32 metric ton, diesel, EURO 6   RoW          |
|                                              |                            | Lebanon, PA                                                                                                                     | 1,390  | transport, freight, lorry, 16-32 metric ton, diesel, unregulated   transport, freight, lorry, 16-32 metric ton, diesel, unregulated   ZA |
|                                              |                            |                                                                                                                                 | 12,573 | transport, freight, sea, container ship, heavy fuel oil   transport, freight, sea, container ship, heavy fuel oil   GLO                  |
|                                              |                            |                                                                                                                                 | 233    | transport, freight, lorry, 16-32 metric ton, diesel, EURO 6   transport, freight, lorry, 16-32 metric ton, diesel, EURO 6   RoW          |
|                                              |                            | Lagos, Nigeria                                                                                                                  | 1,400  | transport, freight, lorry, 16-32 metric ton, diesel, unregulated   transport, freight, lorry, 16-32 metric ton, diesel, unregulated   ZA |
|                                              |                            |                                                                                                                                 | 4752   | transport, freight, sea, container ship, heavy fuel oil   transport, freight, sea, container ship, heavy fuel oil   GLO                  |
|                                              |                            | Kinshasa, DRC                                                                                                                   | 1,970  | transport, freight, lorry, 16-32 metric ton, diesel, EURO 6   transport, freight, lorry, 16-32 metric ton, diesel, EURO 6   RoW          |
|                                              |                            |                                                                                                                                 | 3,251  | transport, freight, sea, container ship, heavy fuel oil   transport, freight, sea, container ship, heavy fuel oil   GLO                  |
|                                              |                            | Harare, Zimbabwe                                                                                                                | 1,129  | transport, freight, lorry, 16-32 metric ton, diesel, EURO 6   transport, freight, lorry, 16-32 metric ton, diesel, EURO 6   RoW          |
| Kigumo, Kenya                                | 1,149                      | transport, freight, lorry, 16-32 metric ton, diesel, EURO 6   transport, freight, lorry, 16-32 metric ton, diesel, EURO 6   RoW |        |                                                                                                                                          |
|                                              | 3,184                      | transport, freight, sea, container ship, heavy fuel oil   transport, freight, sea, container ship, heavy fuel oil   GLO         |        |                                                                                                                                          |

Note: allecoinvent processes are allocation at the point of substitution, system (APOS, S)

## S4.2. Decentralized Manufacturing Scenario Methods

For all nine patient locations, we also conducted an LCA of CAPD using decentralized PD fluid manufacturing in a local dialysis center. In this scenario, solutes and empty bags are shipped to the dialysis center, water is purified on-site, and PD fluid is prepared and packaged before distribution to patient homes. The general process tree for decentralized manufacturing is shown in Figure S20. The material and energy inventory data for decentralized manufacturing were identical to the baseline CAPD scenario (Table S3), except for two changes to the ecoinvent processes:

- The water purification sub-processes varied with patient/dialysis center location and were the same as those used for the ICHD patient location sensitivity (Table S8).
- For corrugated cardboard, US geography processes were used in the Navajo Nation and U.S. patient scenarios while RoW geography processes were used for the sub-Saharan Africa patient scenarios.

Details about the transportation distances and ecoinvent transport processes used are included in Table S18.

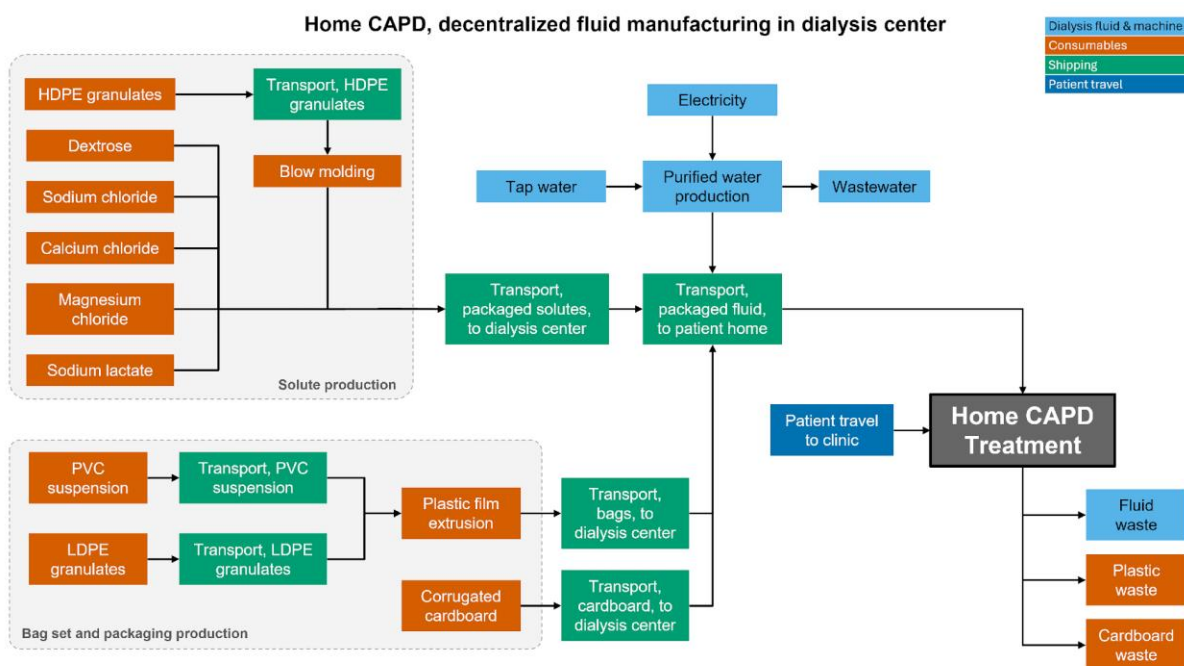

**Figure S20.** Process tree for home CAPD treatment using decentralized fluid manufacturing in a local dialysis center. Solute and bag set (including attached drain bag) production occur at their respective manufacturing facilities before shipping to the dialysis center, where water purification, mixing, and packaging occur. The packaged fluid is then shipped to the patient's home. The patient travels one time monthly to the dialysis center for clinical visits. Waste fluid, plastic, and cardboard are all disposed of following treatment.

**Table S18.** Transportation details for home CAPD with decentralized PD fluid manufacturing in various local dialysis centers.

| <b>Transport process</b>                                                      | <b>Starting location</b>          | <b>Ending location</b>    | <b>Distance (km)</b>              | <b>ecoinvent process</b>                                                                                                        |     |
|-------------------------------------------------------------------------------|-----------------------------------|---------------------------|-----------------------------------|---------------------------------------------------------------------------------------------------------------------------------|-----|
| <b>All scenarios</b>                                                          |                                   |                           |                                   |                                                                                                                                 |     |
| Plastic to bag production                                                     | Jinshan District, Shanghai, China | Anyang, China             | 1,091                             | transport, freight, lorry, 16-32 metric ton, diesel, EURO 6   transport, freight, lorry, 16-32 metric ton, diesel, EURO 6   RoW |     |
|                                                                               |                                   |                           |                                   |                                                                                                                                 |     |
| <b>Navajo Nation/U.S. patient/decentralized fluid manufacturing scenarios</b> |                                   |                           |                                   |                                                                                                                                 |     |
| Bags to dialysis center                                                       | Anyang, China                     | Chinle, Navajo Nation     | 3,978                             | transport, freight, lorry, 16-32 metric ton, diesel, EURO 6   transport, freight, lorry, 16-32 metric ton, diesel, EURO 6   RoW |     |
|                                                                               |                                   |                           | 10,568                            | transport, freight, sea, container ship, heavy fuel oil   transport, freight, sea, container ship, heavy fuel oil   GLO         |     |
|                                                                               |                                   | Fort Washakie, WY         | 2,247                             | transport, freight, lorry, 16-32 metric ton, diesel, EURO 6   transport, freight, lorry, 16-32 metric ton, diesel, EURO 6   RoW |     |
|                                                                               |                                   |                           | 10,568                            | transport, freight, sea, container ship, heavy fuel oil   transport, freight, sea, container ship, heavy fuel oil   GLO         |     |
|                                                                               |                                   | Newton, MS                | 3,729                             | transport, freight, lorry, 16-32 metric ton, diesel, EURO 6   transport, freight, lorry, 16-32 metric ton, diesel, EURO 6   RoW |     |
|                                                                               |                                   |                           | 10,568                            | transport, freight, sea, container ship, heavy fuel oil   transport, freight, sea, container ship, heavy fuel oil   GLO         |     |
|                                                                               |                                   | Minneapolis, MN           | 3,779                             | transport, freight, lorry, 16-32 metric ton, diesel, EURO 6   transport, freight, lorry, 16-32 metric ton, diesel, EURO 6   RoW |     |
|                                                                               |                                   |                           | 10,568                            | transport, freight, sea, container ship, heavy fuel oil   transport, freight, sea, container ship, heavy fuel oil   GLO         |     |
|                                                                               |                                   | New York, NY              | 5,150                             | transport, freight, lorry, 16-32 metric ton, diesel, EURO 6   transport, freight, lorry, 16-32 metric ton, diesel, EURO 6   RoW |     |
|                                                                               |                                   |                           | 10,568                            | transport, freight, sea, container ship, heavy fuel oil   transport, freight, sea, container ship, heavy fuel oil   GLO         |     |
|                                                                               |                                   |                           |                                   |                                                                                                                                 |     |
|                                                                               |                                   | HDPE to solute production | Jinshan District, Shanghai, China | New Brunswick, NJ                                                                                                               | 175 |
|                                                                               | 19,598                            |                           |                                   | transport, freight, sea, container ship, heavy fuel oil   transport, freight, sea, container ship, heavy fuel oil   GLO         |     |
| Solutes to dialysis center                                                    | New Brunswick, NJ                 | Chinle, Navajo Nation     | 3,551                             | transport, freight, lorry, 16-32 metric ton, diesel, EURO 6   transport, freight, lorry, 16-32 metric ton, diesel, EURO 6   RoW |     |
|                                                                               |                                   | Fort Washakie, WY         | 3,253                             | transport, freight, lorry, 16-32 metric ton, diesel, EURO 6   transport, freight, lorry, 16-32 metric ton, diesel, EURO 6   RoW |     |
|                                                                               |                                   | Newton, MS                | 1,791                             | transport, freight, lorry, 16-32 metric ton, diesel, EURO 6   transport, freight, lorry, 16-32 metric ton, diesel, EURO 6   RoW |     |
|                                                                               |                                   | Minneapolis, MN           | 1,942                             | transport, freight, lorry, 16-32 metric ton, diesel, EURO 6   transport, freight, lorry, 16-32 metric ton, diesel, EURO 6   RoW |     |
|                                                                               |                                   | New York, NY              | 58                                | transport, freight, lorry, 16-32 metric ton, diesel, EURO 6   transport, freight, lorry, 16-32 metric ton, diesel, EURO 6   RoW |     |
|                                                                               |                                   |                           |                                   |                                                                                                                                 |     |
| Cardboard to dialysis center                                                  | Memphis, TN                       | Chinle, Navajo Nation     | 1,987                             | transport, freight, lorry, 16-32 metric ton, diesel, EURO 6   transport, freight, lorry, 16-32 metric ton, diesel, EURO 6   RoW |     |
|                                                                               |                                   | Fort Washakie, WY         | 2,212                             | transport, freight, lorry, 16-32 metric ton, diesel, EURO 6   transport, freight, lorry, 16-32 metric ton, diesel, EURO 6   RoW |     |
|                                                                               |                                   | Newton, MS                | 360                               | transport, freight, lorry, 16-32 metric ton, diesel, EURO 6   transport, freight, lorry, 16-32 metric ton, diesel, EURO 6   RoW |     |

|  |  |                 |       |                                                                                                                                 |
|--|--|-----------------|-------|---------------------------------------------------------------------------------------------------------------------------------|
|  |  | Minneapolis, MN | 1,332 | transport, freight, lorry, 16-32 metric ton, diesel, EURO 6   transport, freight, lorry, 16-32 metric ton, diesel, EURO 6   RoW |
|  |  | New York, NY    | 1,780 | transport, freight, lorry, 16-32 metric ton, diesel, EURO 6   transport, freight, lorry, 16-32 metric ton, diesel, EURO 6   RoW |

**Sub-Saharan Africa patient/decentralized fluid manufacturing scenarios**

|                            |                                    |                                    |        |                                                                                                                                          |                                                                                                                                          |
|----------------------------|------------------------------------|------------------------------------|--------|------------------------------------------------------------------------------------------------------------------------------------------|------------------------------------------------------------------------------------------------------------------------------------------|
| Bags to dialysis center    | Anyang, China                      | Lagos, Nigeria                     | 651    | transport, freight, lorry, 16-32 metric ton, diesel, EURO 6   transport, freight, lorry, 16-32 metric ton, diesel, EURO 6   RoW          |                                                                                                                                          |
|                            |                                    |                                    | 19,415 | transport, freight, sea, container ship, heavy fuel oil   transport, freight, sea, container ship, heavy fuel oil   GLO                  |                                                                                                                                          |
|                            |                                    |                                    | 10.3   | transport, freight, lorry, 16-32 metric ton, diesel, unregulated   transport, freight, lorry, 16-32 metric ton, diesel, unregulated   ZA |                                                                                                                                          |
|                            |                                    | Kinshasa, DRC                      |        | 651                                                                                                                                      | transport, freight, lorry, 16-32 metric ton, diesel, EURO 6   transport, freight, lorry, 16-32 metric ton, diesel, EURO 6   RoW          |
|                            |                                    |                                    |        | 17,913                                                                                                                                   | transport, freight, sea, container ship, heavy fuel oil   transport, freight, sea, container ship, heavy fuel oil   GLO                  |
|                            |                                    |                                    |        | 580                                                                                                                                      | transport, freight, lorry, 16-32 metric ton, diesel, unregulated   transport, freight, lorry, 16-32 metric ton, diesel, unregulated   ZA |
|                            |                                    | Harare, Zimbabwe                   |        | 651                                                                                                                                      | transport, freight, lorry, 16-32 metric ton, diesel, EURO 6   transport, freight, lorry, 16-32 metric ton, diesel, EURO 6   RoW          |
|                            |                                    |                                    |        | 11,314                                                                                                                                   | transport, freight, sea, container ship, heavy fuel oil   transport, freight, sea, container ship, heavy fuel oil   GLO                  |
|                            |                                    |                                    |        | 1,662                                                                                                                                    | transport, freight, lorry, 16-32 metric ton, diesel, unregulated   transport, freight, lorry, 16-32 metric ton, diesel, unregulated   ZA |
|                            |                                    | Kigumo, Kenya                      |        | 651                                                                                                                                      | transport, freight, lorry, 16-32 metric ton, diesel, EURO 6   transport, freight, lorry, 16-32 metric ton, diesel, EURO 6   RoW          |
|                            |                                    |                                    |        | 11,942                                                                                                                                   | transport, freight, sea, container ship, heavy fuel oil   transport, freight, sea, container ship, heavy fuel oil   GLO                  |
|                            |                                    |                                    |        | 569                                                                                                                                      | transport, freight, lorry, 16-32 metric ton, diesel, unregulated   transport, freight, lorry, 16-32 metric ton, diesel, unregulated   ZA |
| HDPE to solute production  | Jinshan District, Shanghai, China  | Isando, Kempton Park, South Africa | 125    | transport, freight, lorry, 16-32 metric ton, diesel, EURO 6   transport, freight, lorry, 16-32 metric ton, diesel, EURO 6   RoW          |                                                                                                                                          |
|                            |                                    |                                    | 12,992 | transport, freight, sea, container ship, heavy fuel oil   transport, freight, sea, container ship, heavy fuel oil   GLO                  |                                                                                                                                          |
|                            |                                    |                                    | 577    | transport, freight, lorry, 16-32 metric ton, diesel, unregulated   transport, freight, lorry, 16-32 metric ton, diesel, unregulated   ZA |                                                                                                                                          |
| Solutes to dialysis center | Isando, Kempton Park, South Africa | Lagos, Nigeria                     | 1,431  | transport, freight, lorry, 16-32 metric ton, diesel, unregulated   transport, freight, lorry, 16-32 metric ton, diesel, unregulated   ZA |                                                                                                                                          |
|                            |                                    |                                    | 4,752  | transport, freight, sea, container ship, heavy fuel oil   transport, freight, sea, container ship, heavy fuel oil   GLO                  |                                                                                                                                          |
|                            |                                    | Kinshasa, DRC                      | 2,001  | transport, freight, lorry, 16-32 metric ton, diesel, unregulated   transport, freight, lorry, 16-32 metric ton, diesel, unregulated   ZA |                                                                                                                                          |
|                            |                                    |                                    | 3,250  | transport, freight, sea, container ship, heavy fuel oil   transport, freight, sea, container ship, heavy fuel oil   GLO                  |                                                                                                                                          |
|                            |                                    | Harare, Zimbabwe                   | 1,110  | transport, freight, lorry, 16-32 metric ton, diesel, unregulated   transport, freight, lorry, 16-32 metric ton, diesel, unregulated   ZA |                                                                                                                                          |

|                              |                       |                  |       |                                                                                                                                          |
|------------------------------|-----------------------|------------------|-------|------------------------------------------------------------------------------------------------------------------------------------------|
|                              |                       | Kigumo, Kenya    | 1,146 | transport, freight, lorry, 16-32 metric ton, diesel, unregulated   transport, freight, lorry, 16-32 metric ton, diesel, unregulated   ZA |
|                              |                       |                  | 3,184 | transport, freight, sea, container ship, heavy fuel oil   transport, freight, sea, container ship, heavy fuel oil   GLO                  |
| Cardboard to dialysis center | Gauteng, South Africa | Lagos, Nigeria   | 1,409 | transport, freight, lorry, 16-32 metric ton, diesel, unregulated   transport, freight, lorry, 16-32 metric ton, diesel, unregulated   ZA |
|                              |                       |                  | 4,752 | transport, freight, sea, container ship, heavy fuel oil   transport, freight, sea, container ship, heavy fuel oil   GLO                  |
|                              |                       | Kinshasa, DRC    | 1,979 | transport, freight, lorry, 16-32 metric ton, diesel, unregulated   transport, freight, lorry, 16-32 metric ton, diesel, unregulated   ZA |
|                              |                       |                  | 3,250 | transport, freight, sea, container ship, heavy fuel oil   transport, freight, sea, container ship, heavy fuel oil   GLO                  |
|                              |                       | Harare, Zimbabwe | 1,128 | transport, freight, lorry, 16-32 metric ton, diesel, unregulated   transport, freight, lorry, 16-32 metric ton, diesel, unregulated   ZA |
|                              |                       | Kigumo, Kenya    | 1,126 | transport, freight, lorry, 16-32 metric ton, diesel, unregulated   transport, freight, lorry, 16-32 metric ton, diesel, unregulated   ZA |
|                              |                       |                  | 3,184 | transport, freight, sea, container ship, heavy fuel oil   transport, freight, sea, container ship, heavy fuel oil   GLO                  |

Note: all ecoinvent processes are allocation at the point of substitution, system (APOS, S)

## ***S4.2. Manufacturing Location Sensitivity Analysis Results***

The results for all patient and manufacturing location combinations (Fig. S21) show that geography is a significant determinant of the CAPD CFP. For conventional centralized manufacturing, the total CFP varied from 3,123 kgCO<sub>2</sub>eq for the Nigeria patient/Australia manufacturing scenario (Fig. S21f) to 7,247 kgCO<sub>2</sub>eq for the Wyoming patient/South Africa manufacturing scenario (Fig. S21b), with shipping contributing 23-66%. Because it minimizes the distance over which heavy packaged fluid must be shipped, decentralized fluid manufacturing in a dialysis center led to a lower CFP than centralized fluid manufacturing in all cases: 2,604-2,738 kgCO<sub>2</sub>eq. Furthermore, decentralizing manufacturing made the total home CAPD CFP largely independent of patient geography (~5% variation across all geographies).

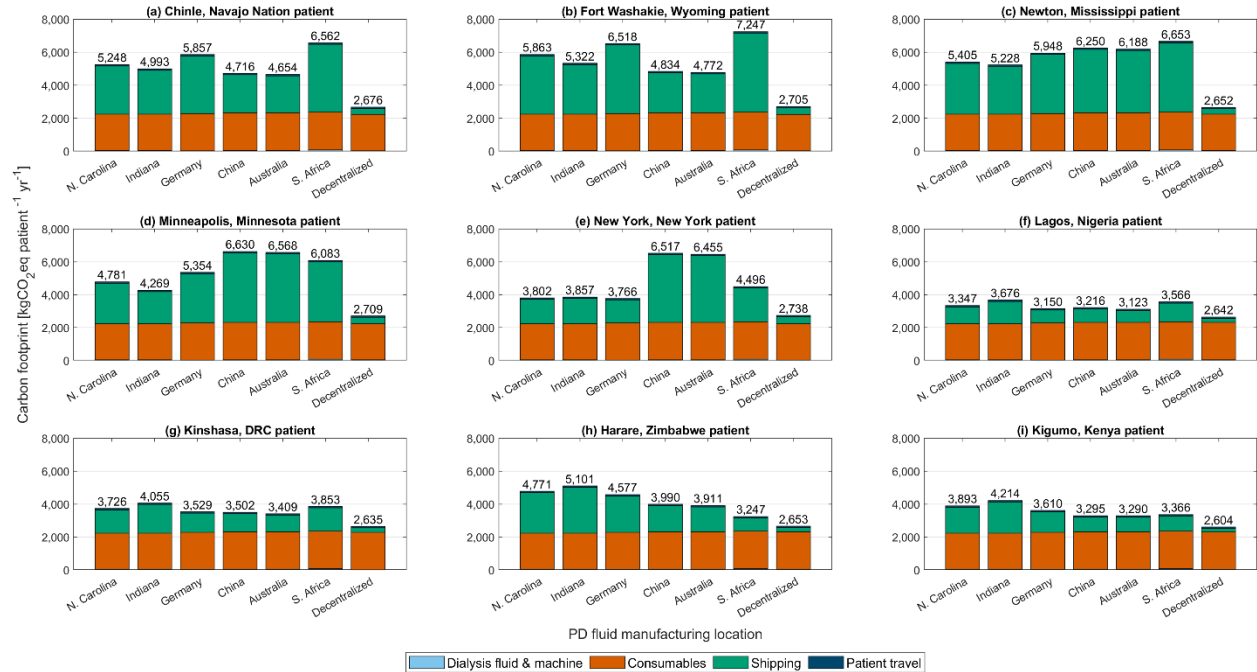

**Figure S21.** Annual per-patient CFP of home CAPD using PD fluid manufactured in various centralized locations or decentralized in a local dialysis center for a patient living in (a) Chinle, Navajo Nation; (b) Fort Washakie, Wyoming; (c) Newton, Mississippi; (d) Minneapolis, Minnesota; (e) New York, New York; (f) Lagos, Nigeria; (g) Kinshasa, DRC; (h) Harare, Zimbabwe; and (i) Kigumo, Kenya. Stacked bars show contributions from dialysis fluid and machine operation, consumables, shipping, and patient travel. The CFP using centralized fluid manufacturing varies significantly with patient and manufacturing location. Decentralized fluid manufacturing leads to a lower CFP than centralized fluid manufacturing in all cases by minimizing the distance over which heavy packaged fluid must be shipped.

## S5. CFP Reduction Metric Assumptions

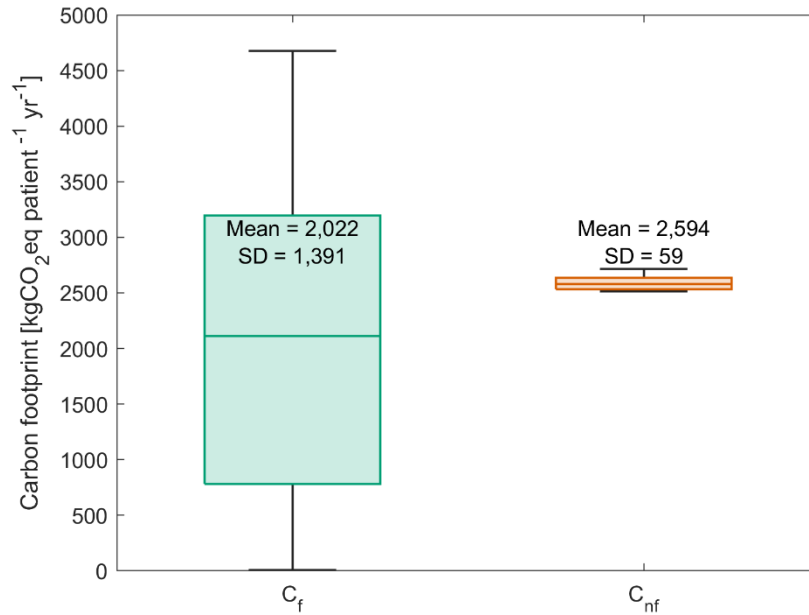

**Figure S22.** Distributions of the annual per-patient CFP of home CAPD from shipping of packaged PD fluid ( $C_{\text{fluid}} = C_f$ ) and from all other processes ( $C_{\text{not fluid}} = C_{nf}$ ) are shown for the 63 previously analyzed scenarios (x54 centralized scenarios, x9 decentralized scenarios). While  $C_{nf}$  does vary slightly with geography (SD = 59 kgCO<sub>2</sub>eq), the most significant variation in CFP comes from shipping of packaged PD fluid,  $C_f$  (SD = 1,391 kgCO<sub>2</sub>eq). Therefore, to enable application of the CFP reduction metric to any location scenario, we assumed  $C_{nf}$  was constant in the CFP reduction metric and used the mean value of 2,594 kgCO<sub>2</sub>eq (see Equation 5).

## References

1. Bonnet, C. *et al.* Autopsy of a Hemodialysis Machine: Potential for Recycling at the End of the Life Cycle. *J. Am. Soc. Nephrol.* **36**, 1126–1137 (2025).
2. Hella, B. D. & Madhusoodhanan, A. K. Life Cycle Assessment (LCA) of a GSS-P 91413 Autoclave Produced in the Getinge Factory. (Halmstad University, Halmstad, Sweden, 2022).
3. Lim, A. E. K., Perkins, A. & Agar, J. W. M. The carbon footprint of an Australian satellite haemodialysis unit. *Aust. Health Rev.* **37**, 369–374 (2013).
4. Connor, A., Lillywhite, R. & Cooke, M. W. The carbon footprints of home and in-center maintenance hemodialysis in the United Kingdom. *Hemodial. Int.* **15**, 39–51 (2011).
5. Barraclough, K. A. *et al.* Updating the Data: The Resource Consumption of Modern-Day Hemodialysis Systems. *Kidney Int. Rep.* **9**, 1521–1524 (2024).
6. Barraclough, K. A. & Agar, J. W. M. Green nephrology. *Nat. Rev. Nephrol.* **16**, 257–268 (2020).
7. NaturaLyte Liquid Acid. *Fresenius Medical Care*  
<https://fmcna.com/products/disposables/concentrates/naturalyte-liquid-acid/>.
8. Sehgal, A. R., Slutzman, J. E. & Huml, A. M. Sources of Variation in the Carbon Footprint of Hemodialysis Treatment. *J. Am. Soc. Nephrol.* **33**, 1790–1795 (2022).
9. Liquid Sodium Bicarbonate Concentrate. *Fresenius Medical Care*  
<https://fmcna.com/products/disposables/concentrates/liquid-sodium-bicarbonate-concentrate/#tabs-389227b08c-item-daa8eaf10e-tab>.
10. Baxter Healthcare Corporation. DIANEAL PD-2 Peritoneal Dialysis Solution [package insert].
11. McAlister, S. *et al.* The Carbon Footprint of Peritoneal Dialysis in Australia. *J. Am. Soc. Nephrol.* **35**, 1095–1103 (2024).
12. Barraclough, K. A. *et al.* Carbon Emissions From Different Dialysis Modalities: A Life Cycle Assessment. *Am. J. Kidney Dis.* S0272638625009205 (2025)  
doi:10.1053/j.ajkd.2025.04.019.
13. The HomeChoice and HomeChoice PRO APD Systems: Patient At-Home Guide. (2009).
14. Kustar, A., Tun, T. H. & Welle, B. From Minibuses to ‘Boda Bodas,’ Informal Transport Could Be an Untapped Climate Change Solution. *Insights* <https://www.wri.org/insights/informal-transport-climate-benefits> (2023).
15. Clarissa Hawes. Medical logistics company divesting trucking, cross-dock operations. *FreightWaves* <https://www.freightwaves.com/news/medical-logistics-company-divesting-trucking-cross-dock-operations>.
16. Jolanda Pretorius Prozzi, Clifford Naude, Daniel Sperling, & Mark Delucchi. *Transportation in Developing Countries: Greenhouse Gas Scenarios for South Africa*.  
<https://www.c2es.org/document/transportation-in-developing-countries-greenhouse-gas-scenarios-for-south-africa/> (2002).
